# Supplementary material for: Impact of Center Volume on Cardiopulmonary and Mortality Outcomes after Immune-Checkpoint Inhibitors for Cancer: A Systematic Review and Meta-Analysis
Source: MDPI journal article supplement (doi:10.3390/cancers16061136), 2024-03-13
Supplement: s1 [file s1]

**Supplementary material**

**Supplementary Tables legend**

**Supplementary Table S1:** Search terms used in our meta-analysis

**Supplementary Table S2:** Quality of included studies using A) Cochrane Collaboration’s tool for assessing risk of bias in randomized trials for quality assessment of randomized clinical trials (RCTs) and B) The Newcastle-Ottawa Quality Assessment Scale (NOS) for non-RCTs

**Supplementary Table S3:** Criteria of included studies

**Supplementary Table S4:** Summary of criteria of different variables included in meta-analysis

**Supplementary Table S5:** List of the 45 excluded studies for the sensitivity analysis

**Supplementary Table S6:** Subgroup analysis of pooled events rates in A) adverse events (AE) 3-4 and B) AE 5 by ITH drugs

**Supplementary Table S7:** Subgroup analysis of pooled events rates A) adverse events (AE) 3-4 and B) AE 5 by ITH class

**Supplementary Table S8:** Subgroup analysis of primary outcomes on lung cancer only vs pancreatic cancer only vs all other cancers

**Supplementary Table S1:** Search terms used in our meta-analysis

| #  | Search                                                                                                                                                                                                                                                                       |
|----|------------------------------------------------------------------------------------------------------------------------------------------------------------------------------------------------------------------------------------------------------------------------------|
| 1  | "immunotherapy"[MeSH Terms] OR "immunotherapy"[All Fields] OR "immunotherapies"[All Fields] OR "immunotherapy s"[All Fields]                                                                                                                                                 |
| 2  | "anti"[All Fields] AND "pd1"[All Fields]                                                                                                                                                                                                                                     |
| 3  | "anti pd1"[All Fields]                                                                                                                                                                                                                                                       |
| 4  | "anti"[All Fields] AND "ctla4"[All Fields]                                                                                                                                                                                                                                   |
| 5  | 2 OR 3 OR 4                                                                                                                                                                                                                                                                  |
| 6  | "atezolizumab"[Supplementary Concept] OR "atezolizumab"[All Fields]                                                                                                                                                                                                          |
| 7  | "ipilimumab"[MeSH Terms] OR "ipilimumab"[All Fields]                                                                                                                                                                                                                         |
| 8  | "durvalumab"[Supplementary Concept] OR "durvalumab"[All Fields]                                                                                                                                                                                                              |
| 9  | "nivolumab"[MeSH Terms] OR "nivolumab"[All Fields] OR "nivolumab s"[All Fields]                                                                                                                                                                                              |
| 10 | "pembrolizumab"[Supplementary Concept] OR "pembrolizumab"[All Fields]                                                                                                                                                                                                        |
| 11 | "cemiplimab"[Supplementary Concept] OR "cemiplimab"[All Fields]                                                                                                                                                                                                              |
| 12 | "avelumab"[Supplementary Concept] OR "avelumab"[All Fields]                                                                                                                                                                                                                  |
| 13 | 6 OR 7 OR 8 OR 9 OR 10 OR 11 OR 12                                                                                                                                                                                                                                           |
| 14 | 1 OR 5 OR 13                                                                                                                                                                                                                                                                 |
| 15 | "cancer s"[All Fields] OR "cancerated"[All Fields] OR "canceration"[All Fields] OR "cancerization"[All Fields] OR "cancerized"[All Fields] OR "cancerous"[All Fields] OR "neoplasms"[MeSH Terms] OR "neoplasms"[All Fields] OR "cancer"[All Fields] OR "cancers"[All Fields] |
| 16 | 14 AND 15                                                                                                                                                                                                                                                                    |

**Supplementary Table S2:** Quality of included studies using A) Cochrane Collaboration’s tool for assessing risk of bias in randomized trials for quality assessment of randomized clinical trials (RCTs) and B) The Newcastle-Ottawa Quality Assessment Scale (NOS) for non-RCTs

| A |                               |                        |                          |                                   |                         |                     |                       |
|---|-------------------------------|------------------------|--------------------------|-----------------------------------|-------------------------|---------------------|-----------------------|
|   | RANDOM SEQUENCE<br>GENERATION | ALLOCATION CONCEALMENT | BLINDING OF PARTICIPANTS | BLINDING OF OUTCOME<br>ASSESSMENT | INCOMPLETE OUTCOME DATA | SELECTIVE REPORTING | OTHER SOURCES OF BIAS |
|   | Altorki 2021                  | +                      | +                        | +                                 | +                       | +                   | +                     |
|   | Amaria 2018                   | +                      | ?                        | -                                 | +                       | +                   | +                     |
|   | Arrieta 2020                  | +                      | +                        | ?                                 | +                       | +                   | +                     |
|   | Cascone 2021                  | +                      | +                        | +                                 | ?                       | +                   | +                     |
|   | Duska 2020                    | +                      | +                        | +                                 | +                       | +                   | +                     |
|   | Ferrarotto 2020               | +                      | +                        | ?                                 | +                       | +                   | +                     |
|   | Lee 2013                      | +                      | ?                        | +                                 | +                       | +                   | +                     |
|   | Liu 2020                      | +                      | +                        | +                                 | +                       | +                   | +                     |
|   | Mahmood 2021                  | +                      | +                        | +                                 | +                       | +                   | +                     |

|               |   |   |   |   |   |   |   |
|---------------|---|---|---|---|---|---|---|
| Pakkala 2020  | + | + | + | ? | + | + | + |
| Sundahl 2019  | + | + | + | + | + | + | + |
| Tobin 2018    | + | + | ? | + | + | + | + |
| Voorwerk 2019 | + | + | - | + | + | + | + |
| Welsh 2020    | + | + | + | + | + | + | + |
| Zhu 2022      | + | + | - | - | + | + | + |

|   |           |
|---|-----------|
| + | Low Risk  |
| ? | Uncertain |
| - | High Risk |

| B            |           |               |         |       |
|--------------|-----------|---------------|---------|-------|
| Study        | Selection | Comparability | Outcome | Total |
| Aamdal 2021  | ***       | *             | ***     | ***** |
| Ariyan 2018  | ***       | *             | ***     | ***** |
| Awada 2020   | ****      | **            | ***     | ***** |
| Ben-Ami 2017 | ***       | *             | ***     | ***** |
| Bjoern 2016  | ***       | *             | ***     | ***** |
| Boutros 2020 | ***       | **            | ***     | ***** |

|                             |      |    |     |       |
|-----------------------------|------|----|-----|-------|
| <b>Brastianos 2020</b>      | ***  | *  | *** | ***** |
| <b>Brustugun 2017</b>       | ***  | *  | *** | ***** |
| <b>Calabrò 2013</b>         | ***  | *  | *** | ***** |
| <b>Calabrò 2015</b>         | **** | *  | *** | ***** |
| <b>Calabrò 2018</b>         | ***  | *  | *** | ***** |
| <b>Chalmers 2019</b>        | ***  | *  | *** | ***** |
| <b>Chang 2021</b>           | **** | ** | *** | ***** |
| <b>Chintakuntlawar 2019</b> | ***  | *  | *** | ***** |
| <b>Cho 2019</b>             | **** | *  | *** | ***** |
| <b>Chu 2021</b>             | ***  | *  | *** | ***** |
| <b>Chung 2019</b>           | ***  | *  | *** | ***** |
| <b>Da Gama Duarte 2018</b>  | ***  | *  | *** | ***** |
| <b>DAngelo 2017</b>         | **** | *  | *** | ***** |
| <b>Di Giacomo 2011</b>      | ***  | ** | *** | ***** |
| <b>Di Giacomo 2019</b>      | **** |    | *** | ***** |
| <b>Di Noia 2021</b>         | ***  | ** | *** | ***** |
| <b>Disselhorst 2019</b>     | **** | *  | *** | ***** |
| <b>Duffy 2017</b>           | **** | *  | *** | ***** |
| <b>Edenfield 2021</b>       | ***  | *  | *** | ***** |
| <b>Eichhorn 2021</b>        | ***  | *  | *** | ***** |
| <b>Elbers 2020</b>          | ***  | *  | *** | ***** |

|                            |      |    |     |       |
|----------------------------|------|----|-----|-------|
| <b>Feng 2020</b>           | ***  | *  | *** | ***** |
| <b>Ferrarotto 2021</b>     | ***  | *  | *** | ***** |
| <b>Feun 2019</b>           | ***  | ** | *** | ***** |
| <b>Freeman-Keller 2016</b> | ***  | ** | *** | ***** |
| <b>Frumovitz 2020</b>      | ***  | *  | *** | ***** |
| <b>Gao J. 2020</b>         | ***  | *  | *** | ***** |
| <b>Gao S. 2020</b>         | ***  | *  | *** | ***** |
| <b>Giaccone 2018</b>       | ***  | *  | *** | ***** |
| <b>Goldberg 2016</b>       | **** |    | *** | ***** |
| <b>Goldberg 2020</b>       | ***  | *  | *** | ***** |
| <b>Graff 2016</b>          | ***  | *  | *** | ***** |
| <b>Graff 2020</b>          | ***  | *  | *** | ***** |
| <b>Gray 2019</b>           | **** | *  | *** | ***** |
| <b>Haag 2018</b>           | ***  | *  | *** | ***** |
| <b>Habra 2019</b>          | ***  | *  | *** | ***** |
| <b>Hamanishi 2015</b>      | **** | *  | *** | ***** |
| <b>Hasan Ali 2019</b>      | ***  | *  | *** | ***** |
| <b>Hodi 2014</b>           | **** |    | *** | ***** |
| <b>Horinouchi 2015</b>     | **** | *  | *** | ***** |
| <b>Huang 2019</b>          | ***  | *  | *** | ***** |
| <b>Kamath 2020</b>         | ***  | *  | *** | ***** |
| <b>Kanda 2016</b>          | **** |    | *** | ***** |

|                        |      |    |     |       |
|------------------------|------|----|-----|-------|
| <b>Kanda 2020</b>      | **** | *  | *** | ***** |
| <b>Kawazoe 2020</b>    | ***  | *  | *** | ***** |
| <b>Kelly 2020</b>      | ***  | *  | *** | ***** |
| <b>Kim 2020</b>        | ***  | *  | *** | ***** |
| <b>Kitano 2021</b>     | **** | *  | *** | ***** |
| <b>Kluger 2019</b>     | ***  | *  | *** | ***** |
| <b>Lam 2021</b>        | ***  | *  | *** | ***** |
| <b>Lin 2020</b>        | ***  | *  | *** | ***** |
| <b>Lisberg 2018</b>    | ***  | *  | *** | ***** |
| <b>Luke 2018</b>       | ***  | *  | *** | ***** |
| <b>Ma 2021</b>         | ***  | *  | *** | ***** |
| <b>Madan 2012</b>      | ***  | ** | **  | ***** |
| <b>Mahalingam 2020</b> | ***  | *  | *** | ***** |
| <b>Maity 2018</b>      | **** |    | *** | ***** |
| <b>Maity 2021</b>      | **** | *  | *** | ***** |
| <b>Majd 2020</b>       | ***  | *  | *** | ***** |
| <b>Maker 2005</b>      | ***  | *  | *** | ***** |
| <b>Maker 2006</b>      | ***  | *  | *** | ***** |
| <b>Marcq 2021</b>      | ***  | ** | **  | ***** |
| <b>Massarelli 2019</b> | ***  | ** | **  | ***** |
| <b>McNeel 2012</b>     | **** |    | *** | ***** |
| <b>Mego 2019</b>       | ***  | *  | *** | ***** |

|                       |      |    |     |       |
|-----------------------|------|----|-----|-------|
| <b>Merchant 2016</b>  | **** | ** | *** | ***** |
| <b>Miyamoto 2019</b>  | ***  |    | **  | ***** |
| <b>Music 2020</b>     | ***  | *  | *** | ***** |
| <b>Naing 2020</b>     | ***  | *  | *** | ***** |
| <b>ONeill 2020</b>    | ***  | *  | *** | ***** |
| <b>Parikh 2018</b>    | **** | *  | *** | ***** |
| <b>Patel 2017</b>     | ***  | *  | *** | ***** |
| <b>Pelster 2021</b>   | ***  | *  | *** | ***** |
| <b>Perez 2021</b>     | ***  | *  | *** | ***** |
| <b>Postow 2020</b>    | **** |    | *** | ***** |
| <b>Qiao 2019</b>      | **** | *  | *** | ***** |
| <b>Qin 2017</b>       | ***  | ** | *** | ***** |
| <b>Ralph 2010</b>     | ***  | *  | *** | ***** |
| <b>Ratnayake 2020</b> | ***  | *  | *** | ***** |
| <b>Ray 2016</b>       | ***  | *  | *** | ***** |
| <b>Reilley 2017</b>   | **** |    | *** | ***** |
| <b>Reschke 2021</b>   | **** | *  | **  | ***** |
| <b>Reuben 2006</b>    | ***  | *  | *** | ***** |
| <b>Rodriguez 2020</b> | **** | *  | *** | ***** |
| <b>Ross 2020</b>      | ***  | *  | *** | ***** |
| <b>Royal 2010</b>     | ***  | *  | *** | ***** |
| <b>Rozeman 2020</b>   | **** |    | *** | ***** |



|                         |      |    |     |       |
|-------------------------|------|----|-----|-------|
| <b>Sahebjam 2021</b>    | **** | *  | *** | ***** |
| <b>Sakamuri 2018</b>    | ***  | *  | *** | ***** |
| <b>Sarfaty 2021</b>     | ***  | *  | *** | ***** |
| <b>Schoenfeld 2020</b>  | **** |    | *** | ***** |
| <b>Schweizer 2020</b>   | **** | *  | *** | ***** |
| <b>Shah 2020</b>        | **** | *  | *** | ***** |
| <b>Shenderov 2021</b>   | **** | *  | *** | ***** |
| <b>Shoushtari 2018</b>  | ***  | *  | *** | ***** |
| <b>Strauss 2018</b>     | **** |    | *** | ***** |
| <b>Sundahl 2019</b>     | ***  | *  | *** | ***** |
| <b>Suresh 2019</b>      | **** |    | *** | ***** |
| <b>Takahashi 2020</b>   | ***  | ** | *** | ***** |
| <b>Tang 2019</b>        | ***  | ** | *** | ***** |
| <b>Thomas 2019</b>      | ***  | *  | *** | ***** |
| <b>Tree 2018</b>        | ***  | ** | **  | ***** |
| <b>Tsimberidou 2021</b> | ***  | *  | *** | ***** |
| <b>van Dijk 2020</b>    | **** |    | *** | ***** |
| <b>Wang 2020</b>        | **** | *  | *** | ***** |
| <b>Weber 2013</b>       | **** |    | *** | ***** |
| <b>Weber 2016</b>       | ***  | *  | *** | ***** |
| <b>Wei 2020</b>         | **** |    | *** | ***** |
| <b>Weide 2017</b>       | ***  | *  | *** | ***** |

|                 |      |    |     |       |
|-----------------|------|----|-----|-------|
| Weiss 2017      | ***  | *  | *** | ***** |
| Weiss 2018      | ***  | *  | *** | ***** |
| Welsh 2019      | ***  | *  | *** | ***** |
| Welsh JW 2020   | ***  | *  | *** | ***** |
| Welsh J.W. 2020 | ***  | *  | *** | ***** |
| Wilgenhof 2016  | ***  | *  | *** | ***** |
| Wilky 2019      | ***  | *  | *** | ***** |
| Xie C. 2020     | **** |    | *** | ***** |
| Xie L. 2020     | ***  | ** | *** | ***** |
| Yamamoto 2017   | ***  | *  | *** | ***** |
| Yang 2007       | **** |    | *** | ***** |
| Yang 2018       | **** | *  | **  | ***** |
| Yarchoan 2020   | ***  | *  | *** | *     |
| Yuan 2021       | ***  | ** | *** | ***** |
| Zamarin 2020    | ***  | *  | *** | ***** |
| Zhang 2021      | ***  | *  | *** | ***** |
| Zimmer 2019     | ***  | *  | *** | ***** |

Supplementary Table S3: Criteria of included studies,

| Author/year          | Stud | Pati | Country | Cancer type        | Mea  | Male | Pathology (commonest                 | Unde | Re  | Re  | ITH drug       | Target | Mean follow-                                                  | Overall                                   | Progression-                                   | AE  |
|----------------------|------|------|---------|--------------------|------|------|--------------------------------------|------|-----|-----|----------------|--------|---------------------------------------------------------------|-------------------------------------------|------------------------------------------------|-----|
| Lam 2021 (1)         | P    | 40   | China   | Lung cancer        | 61.5 | 20   | Lung cancer                          | N/A  | 13  | 9   | atezolizuma    | PD-L1  | 17.8 months                                                   | Median                                    | 9.4 ( 95%                                      | 2   |
| Edenfield 2021 (2)   | P    | 49   | USA     | Rare solid cancers | 62   | 22   | Cholangiocarcinoma 12 (24%)          | N/A  | N/A | 0   | N/A            | N/A    | 18 months                                                     | N/A                                       | N/A                                            | N/A |
| Ferrarotto 2021 (3)  | P    | 20   | USA     | Skin Cancer        | 68   | 17   | SCC                                  | 17   | 13  | 13  | pembrolizu mab | PD-1   | 44.1 months                                                   | 8.31 months                               | 2.04 months                                    | N/A |
| Zhu 2022 (4)         | RCT  | 170  | China   | Pancreatic cancer  | N/A  | 105  | ADC                                  | N/A  | N/A | N/A | pembrolizu     | PD-1   | 23.3 months                                                   | 24.9 months                               | 18.3 months                                    | N/A |
| Reschke 2021 (5)     | P    | 17   | Germany | Skin Cancer        | 70   | 9    | Melanoma                             | N/A  | 2   | 2   |                |        | Follow-up of patients was after at least 6 months (maximum 18 | N/A                                       | N/A                                            | N/A |
| Chang 2021 (6)       | P    | 25   | Taiwan  | solid cancers      | 54   | 21   | Not specified                        | N/A  | 17  | 25  | pembrolizu mab | PD-1   | Not reported                                                  | 8.5 months (95% CI, 6.6~ not reached) for | 1.9 months (95% CI, 1.9 ~ 6) by RECIST and 2.0 | N/A |
| Zhang 2021 (7)       | RCT  | 20   | China   | Esophageal cancer  | 64   | 12   | SCC                                  | N/A  | 20  | N/A | camrelizum ab  | PD-1   | 31.0 months                                                   | 16.7 months                               | 11.7 months                                    | N/A |
| Tsimberidou 2021 (8) | P    | 12   | USA     | Germ cell tumors   | 35   | 83.3 | Testicular germ cell tumor, 7(58.3%) | 0    | 0   | 12  | pembrolizu mab | PD-1   | N/A                                                           | 10.6 (95% CI, 4.6–27.1)                   | 2.4 (95% [CI], 1.5–4.5)                        | 6   |
| Marcq 2021 (9)       | P    | 8    | Canada  | Bladder Cancer     | 68   | 75   | Bladder Cancer                       | 8    | 8   | 8   | atezolizuma b  | PD-L1  | N/A                                                           | N/A                                       | N/A                                            | 5   |
| Altorki 2021 (10)    | RCT  | 60   | USA     | Lung cancer        | 70.5 | 51.6 | ADC: 34(56.6%)                       | 52   | 30  | N/A | durvalumab     | PD-L1  | 16.9 months                                                   | N/A                                       | N/A                                            | 11  |

|                     |     |    |        |                                            |      |      |                                  |    |    |    |                   |        |                                                  |                                                               |                                                           |    |
|---------------------|-----|----|--------|--------------------------------------------|------|------|----------------------------------|----|----|----|-------------------|--------|--------------------------------------------------|---------------------------------------------------------------|-----------------------------------------------------------|----|
| Di Noia 2021 (11)   | RCT | 42 | Italy  | Lung cancer                                | 70.5 | 71   | Non-SCC: 36 (86%)                | 0  | 24 | 0  | pembrolizu<br>mab | PD-1   | 18.5 mo                                          | Not reached<br>in group<br>1&2<br>Group 3: 7.2<br>(95% CI 5.6 | Median PFS<br>for all groups :<br>8 (95% CI:<br>4.4–17.4) | 1  |
| Aamdal 2021 (12)    | P   | 12 | Norway | Melanoma                                   | 57   | 58   | Melanoma                         | 0  | 0  | 4  | ipilimumab        | CTLA-4 | 61.0 months                                      | not reached                                                   | 6.7                                                       | 5  |
| Shenderov 2021 (13) | P   | 30 | USA    | Prostate Cancer                            | 67   | 100  | ADC                              | 0  | 0  | 30 | N/A               | N/A    | 9.9 (range, 2.3<br>–17.3)                        | 9.5 (8.1,<br>11.4)                                            | 3.0 (2.7, 5.5)                                            | 12 |
| Sahebjam 2021 (14)  | P   | 32 | USA    | High grade Gliomas                         | 52.5 | 65.6 | Glioblastoma: 90.6%              | 14 | 32 | 32 | pembrolizu<br>mab | PD-1   | Group A: 3.7<br>months<br>Group B: 3.1<br>months | Group A:<br>13.45 months<br>Group B: 9.3<br>months            | Group A:<br>7.92 months<br>Group B:<br>6.54 months        | 12 |
| Chu 2021 (15)       | P   | 22 | China  | Lung cancer                                | 64.5 | 95.5 | SCC 54.5%                        | 0  | 0  | 0  | sintilimab        | PD-1   | 15.8 months                                      | N/A                                                           | 15 months                                                 | 12 |
| Ma 2021 (16)        | P   | 39 | China  | Melanoma or<br>nasopharyngeal<br>carcinoma | 48   | 72   | Nasopharyngeal<br>carcinoma: 76% | 23 | 19 | 25 | ipilimumab        | CTLA-4 | Group A: 4.9<br>Group B: 4.8                     | Group A: Not<br>reached<br>Group B:<br>76.6%                  | Group A: 10.1<br>Group B:<br>14.3%                        | 0  |

|                    |     |    |                |                                                                                                                                                      |       |      |                          |     |     |     |                         |                |                        |                                                                              |                                                                                 |     |
|--------------------|-----|----|----------------|------------------------------------------------------------------------------------------------------------------------------------------------------|-------|------|--------------------------|-----|-----|-----|-------------------------|----------------|------------------------|------------------------------------------------------------------------------|---------------------------------------------------------------------------------|-----|
| Cascone 2021 (17)  | RCT | 44 | USA            | Lung cancer                                                                                                                                          | 65.6  | 64   | ADC: 59%                 | 39  | 4   | 17  | Nivolumab & Ipilimumab  | PD-1 & CTLA-4  | 22.2 months            | Group A: 22 patients alive at end of follow up<br>Group B: 21 Patients alive | Group A: 19 Patients progression free<br>Group B: 16 Patients Progression free  | 5   |
| Eichhorn 2021 (18) | P   | 15 | Germany        | Lung cancer                                                                                                                                          | 59.8  | 46.6 | ADC: 86.6%               | 12  | 0   | 0   | pembrolizu mab          | PD-1           | N/A                    | N/A                                                                          | N/A                                                                             | 3   |
| Pelster 2021 (19)  | P   | 35 | United States. | Skin Cancer                                                                                                                                          | 62    | 12   | Melanoma                 | N/A | N/A | 1   | N/A                     | N/A            | 13.0 months            | 19.1 months.                                                                 | 5.5 months                                                                      | 0   |
| Sarfaty 2021 (20)  | P   | 13 | United States. | carcinoma of the urinary tract                                                                                                                       | 57    | 10   | SCC ADC                  | 5   | N/A | 21  | N/A                     | N/A            | 7.38 months            | 6.97 months                                                                  | 1.8 months                                                                      | N/A |
| Yuan 2021 (21)     | P   | 16 | United States. | Breast cancer                                                                                                                                        | 64    | 0    | Triple -ve Breast cancer | 16  | 15  | N/A | pembrolizu mab          | PD-1           | 24.9 months            | 2.6 months                                                                   | 25.5 months                                                                     | N/A |
| Perez 2021 (22)    | P   | 21 | USA            | Lung cancer                                                                                                                                          | 66    | 62   | SCLC                     | 0   | 21  | 21  | N/A                     | N/A            | N/A                    | 11.7 months                                                                  | 4.5 months                                                                      | 16  |
| Maity 2021         | P   | 22 | USA            | Melanoma                                                                                                                                             | N/A   | 77.2 | Melanoma                 | 0   | 22  | 11  | ipilimumab              | CTLA-4         | 89.2 months            | 10.7 months                                                                  | 3.6 months                                                                      | 3   |
| Kitano 2021 (24)   | P   | 13 | Japan          | Lung: 15.4%<br>Bladder: 7.7%<br>Breast: 7.7)<br>Urethra: 1 (7.7%)<br>Uterus: 1 (7.7%)<br>Ovary: 1 (7.7%)<br>prostate: 1 (7.7%)<br>pancreas: 1 (7.7%) | 62    | 38.4 | N/A                      | 9   | 7   | 12  | cemiplimab              | PD-1           | 8.11 (range 2.0–26.1). | N/A                                                                          | N/A                                                                             | 4   |
| Mahmood 2021 (25)  | RCT | 20 | USA            | Adenoid Cystic Carcinoma                                                                                                                             | 64.5  | 20   | Adenoid Cystic Carcinoma | 19  | 17  | 9   | pembrolizu mab          | PD-1           | 19.8 months            | Not reached                                                                  | Arm A: 4.5 months (95%[CI], 2.4-20.6 )<br>Arm B: 3.16 months (95%[CI], 1.4-5.0) | 1   |
| Pakkala 2020 (26)  | RCT | 18 | USA            | Lung Cancer                                                                                                                                          | 70.00 | 61.1 | SCLC                     | 0   | 0   | 18  | Durvalumab + Tremelimum | PD-L1 & CTLA-4 | N/A                    | Median OS:3.9                                                                | Median PFS: 3.16.00                                                             | N/A |

|                     |     |     |                 |                                        |      |      |                                                   |    |    |    |                   |       |                     |                                        |                                                                      |     |
|---------------------|-----|-----|-----------------|----------------------------------------|------|------|---------------------------------------------------|----|----|----|-------------------|-------|---------------------|----------------------------------------|----------------------------------------------------------------------|-----|
| Majd 2020 (27)      | P   | 4   | USA             | Pituitary carcinoma                    | 27.5 | 50   | corticotroph adenoma: 3<br>Lactotroph adenoma : 1 | 3  | 3  | 4  | pembrolizu<br>mab | PD-1  | N/A                 | 80                                     | 8                                                                    | 0   |
| van Dijk 2020 (28)  | P   | 24  | Netherland<br>s | Urinary Bladder<br>Cancer              | 65   | 75   | Urothelial Carcinoma                              | 24 | 0  | 0  | N/A               | N/A   | 8.3 months          | Obtained<br>from Kaplan<br>Meier curve | Obtained from<br>Kaplan Meier<br>curve                               | 13  |
| Gao 2020 (29)       | P   | 28  | USA             | Urinary Bladder<br>Cancer              | 71   | 71   | Pure urothelial carcinoma<br>21 (75%)             | 24 | 0  | 0  | N/A               | N/A   | 19.2                | 88.8%                                  | 82.8%                                                                | 6   |
| Welsh 2020 (30)     | P   | 40  | USA             | Lung cancer                            | 64   | 40   | SCLC: 36 (90%)                                    | 0  | 40 | 40 | pembrolizu<br>mab | PD-1  | 23.1 months         | 39.5 months                            | 19.7 months                                                          | N/A |
| Duska 2020 (31)     | RCT | 52  | USA             | Cancer Cervix                          | 49   | 0    | squamous cell carcinoma                           | 0  | 52 | 52 | pembrolizu<br>mab | PD-1  | 4.8 months          | N/A                                    | N/A                                                                  | 34  |
| Schweizer 2020 (32) | P   | 104 | Germany         | HNSCC 44 (42%)<br>Lung Cancer 46 (44%) | N/A  | 73   | Squamous cell Carcinoma<br>64 (65%)               | 0  | 50 | 6  | N/A               | N/A   | 8.3 months.         | 22.8 months                            | 7.8 months                                                           | 4   |
| Takahashi 2020 (33) | P   | 57  | Japan           | Melanoma                               | 58   | 49.1 | Melanoma                                          | 0  | 0  | 0  | N/A               | N/A   | 6.75 months         | 14 months                              | 3.3 months                                                           | 32  |
| Awada 2020 (34)     | P   | 54  | Belgium         | Glioblastoma                           | 55   | 63   | Glioblastoma                                      | 45 | 45 | 43 | avelumab          | PD-L1 | 24.9                | 26.6                                   | Cohort 1: 12.0                                                       | N/A |
| Welsh 2020 (35)     | RCT | 100 | USA             | Lung cancer                            | 65   | 64   | ADC: 77(77%)                                      | 0  | 18 | 37 | pembrolizu<br>mab | PD-1  | 20.4 (1.4–<br>30.2) | N/A                                    | SBRT Group:<br>20.8 RT<br>Group: 6.8<br>Pembrolizuma<br>b Alone: 6.8 | 17  |

|                      |     |    |            |                                                 |      |      |                                     |     |     |     |                |        |                            |                           |                          |     |
|----------------------|-----|----|------------|-------------------------------------------------|------|------|-------------------------------------|-----|-----|-----|----------------|--------|----------------------------|---------------------------|--------------------------|-----|
| Wang 2020 (36)       | P   | 41 | China      | Lung Cancer                                     | 59   | 70.7 | ADC: 29 (70.7%)<br>SCC: 10 (24.4%)  | 14  | 20  | 41  | toripalimab    | PD-1   | 14.9 (3.2-22.5) months     | 13.8 months (95% CI, 10.0 | 2.8 (95% CI, 2.7 to 4.6) | 1   |
| Schoenfeld 2020 (37) | P   | 29 | USA        | HNSCC                                           | 65.2 | 62.1 | SCC                                 | 29  | 0   | 0   | N/A            | N/A    | 14.2 months                | 89%                       | 85%                      | N/A |
| ONeill 2020 (38)     | P   | 10 | USA        | Pancreatic Cancer                               | 62   | 40   | Adenocarcinoma                      | 10  | N/A | 10  | nivolumab      | PD-1   | 12 Months                  | 18.0 months               | 6.8 months               | 7   |
| Frumovitz 2020 (39)  | P   | 7  | USA        | Gynecologic small cell neuroendocrine carcinoma | 41   | 0    | Small cell Neuroendocrine Carcinoma | 0   | N/A | N/A | pembrolizu mab | PD-1   | N/A                        | N/A                       | 2.1 months (Median)      | 2   |
| Ratnayake 2020 (40)  | P   | 24 | Austrialia | Melanoma                                        | 66.8 | 79   | N/A                                 | 0   | 24  | 0   | N/A            | N/A    | 28 months                  | 16.9 months               | 2.2 months               | N/A |
| Boutros 2020 (41)    | P   | 19 | France     | Melanoma                                        | 58   | 53   | N/A                                 | N/A | 19  | N/A | ipilimumab     | CTLA-4 | 5.8 years (Q1=4.5; Q3=6.8) | 0.9 years (0.5–2)         | 0.4 (0.2–1.4)            | N/A |
| Kawazoe 2020 (42)    | P   | 29 | Japan      | Gastric and esophageal                          | 70   | 90   | Intestinal: 15 (52%)                | 6   | 0   | 15  | pembrolizu mab | PD-1   | 12.6 (10.5-14.3)           | not reached               | 7.1 (5.4-13.7)           | 14  |
| Wei 2020 (43)        | P   | 25 | China      | Solid tumors                                    | 52   | 80   | N/A                                 | N/A | N/A | 25  | toripalimab    | PD-1   | 5mo (1.5-19.8)             | N/A                       | N/A                      | 0   |
| Brastianos 2020 (44) | P   | 20 | USA        | Solid tumors                                    | 51.5 | 0    | N/A                                 | 10  | 18  | 20  | pembrolizu mab | PD-1   | N/A                        | 3.6 months                | N/A                      | 8   |
| Kim 2020 (45)        | P   | 9  | USA        | lung cancer or high grade neuroendocrine        | 61   | 44   | SCLC: 6 (67%)                       | 0   | 3   | 9   | nivolumab      | PD-1   | 6.8 mos                    | N/A                       | N/A                      | 5   |
| Graff 2020 (46)      | P   | 28 | USA        | Prostate                                        | 72   | 100  | Not specified                       | 11  | 8   | 4   | pembrolizu mab | PD-1   | 37 months                  | 21.9 months               | N/A                      | N/A |
| Ferrarotto 2020 (47) | RCT | 28 | USA        | Oropharyngeal                                   | N/A  | 97   | N/A                                 | 0   | 9   | 0   | N/A            | N/A    | 15.8 months                | 100% still alive          | N/A                      | 4   |
| Postow 2020 (48)     | P   | 20 | USA        | Melanoma                                        | 60   | 60   | N/A                                 | 0   | 10  | N/A | N/A            | N/A    | 19.4 months                | 1 year OS 56.3%           | N/A                      | 7   |

|                    |     |     |                 |                      |      |      |                                     |     |     |     |                   |        |                      |                                          |                                       |           |
|--------------------|-----|-----|-----------------|----------------------|------|------|-------------------------------------|-----|-----|-----|-------------------|--------|----------------------|------------------------------------------|---------------------------------------|-----------|
| Zamarin 2020 (49)  | P   | 27  | USA             | Ovarian              | 64   | 0    | High grade serous: 23 (85.2%)       | 0   | 0   | 27  | durvalumab        | PD-L1  | 29 months            | 21 months                                | 2.8 months                            | N/A       |
| Feng 2020 (50)     | P   | 32  | China           | Hepatobiliary        | 60   | 56   | N/A                                 | 21  | 10  | 7   | nivolumab         | PD-1   | 12.8 months          | 8.5 months                               | 6.1 months                            | N/A       |
| Kanda 2020 (51)    | P   | 24  | Japan           | Lung Cancer          | 63   | 70.8 | ADC: 79.2%                          | N/A | N/A | N/A | nivolumab         | PD-1   | N/A                  | N/A                                      | N/A                                   | 2         |
| Arrieta 2020 (52)  | RCT | 78  | Mexico          | Lung Cancer          | 50.1 | 41   | ADC: 88%                            | 0   | 0   | 43  | pembrolizu<br>mab | PD-1   | 8.9 months           | 14.8                                     | 9.5 months                            | 2         |
| Rozeman 2020 (53)  | P   | 38  | Netherland<br>s | Melanoma             | 62   | 59   | N/A                                 | N/A | N/A | N/A | ipilimumab        | CTLA-4 | N/A                  | 12.4                                     | 3 mos                                 | 16        |
| Xie 2020 (54)      | P   | 59  | USA             | pancreatic           | 61   | 63   | N/A                                 | 0   | 0   | 59  | durvalumab        | PD-L1  | N/A                  | A1: 3.3 mos (1.2-6.6)<br>A2: 9 ( 5-18.4) | A1: 1.7mos (0.8-2.0)<br>A2: 2.5 (0.1- | 18        |
| Music 2020 (55)    | P   | 78  | Canada          | solid tumors         | 61   | 45   | High Grade serous ovarian carcinoma | N/A | N/A | N/A | pembrolizu<br>mab | PD-1   | N/A                  | 23.8 mo                                  | N/A                                   | 7         |
| Liu 2020 (56)      | RCT | 40  | China           | Breast               | 45.5 | 0    | Triple negative                     | N/A | N/A | 30  | camrelizum<br>ab  | PD-1   | N/A                  | 8.1 mos (4.0-not reached)                | 3.7 mos (2.0-6.4)                     | 10        |
| Xie 2020 (57)      | P   | 43  | China           | Osteosarcoma         | 19   | 73   | N/A                                 | 0   | 0   | 43  | camrelizum        | PD-1   | 11.3 (7.1-           | 11.3 mos                                 | 6.2 mos(4-                            | 30        |
| Goldberg 2020 (58) | P   | 42  | USA             | Lung Cancer          | 60   | 33   | ADC: 86%                            | N/A | N/A | 27  | pembrolizu<br>mab | PD-1   | 8.3 mos (4.5-26.2)   | 1yr OS 40% (30-64%)                      | 1.9 (1.8-3.7)                         | 7         |
| Gao 2020 (59)      | P   | 40  | China           | Lung Cancer          | 59.8 | 82.5 | SCC: 82.5%                          | 0   | 0   | 0   | sintilimab        | PD-1   | 3.2 mos(1.2-12.1)    | N/A                                      | N/A                                   | 4.0<br>0  |
| Kamath 2020 (60)   | P   | 21  | USA             | Pancreatic Cancer    | 66   | 38   | ADC: 86%                            | 8   | 4   | 14  | ipilimumab        | CTLA-4 | N/A                  | 6.9 mos (2.6-9.6)                        | 2.78mos (1.6-4.8)                     | 16.<br>00 |
| Naing 2020 (61)    | P   | 127 | USA             | Multiple solid tumor | 56   | 54   | N/A                                 | N/A | N/A | 127 | pembrolizu<br>mab | PD-1   | N/A                  | N/A                                      | N/A                                   | 11.<br>00 |
| Kelly 2020 (62)    | P   | 20  | USA             | Sarcoma              | 63.5 | 40   | N/A                                 | 0   | 0   | 19  | pembrolizu<br>mab | PD-1   | 56 weeks             | 74.7wks (49-n/a)                         | 17.1 wks (12.6-n/a)                   | 4         |
| Ross 2020 (63)     | P   | 12  | USA             | Prostate             | 65.5 | 100  | N/A                                 | 0   | 0   | 0   | pembrolizu<br>mab | PD-1   | 31.3 mos (18.1-39.3) | N/A                                      | 17.5mos (not specified)               | 0         |



|                      |   |     |                 |                                                                                                 |      |    |                                                                                               |     |     |     |                   |        |                                                                            |                                                  |                                                        |           |
|----------------------|---|-----|-----------------|-------------------------------------------------------------------------------------------------|------|----|-----------------------------------------------------------------------------------------------|-----|-----|-----|-------------------|--------|----------------------------------------------------------------------------|--------------------------------------------------|--------------------------------------------------------|-----------|
| Rodriguez 2020 (64)  | P | 50  | USA             | HEENT                                                                                           | 60.5 | 78 | N/A                                                                                           | 0   | 0   | 25  | pembrolizu<br>mab | PD-1   | 12.6 mo                                                                    | 12.6mos<br>(8.1-not<br>reached)                  | 4.5 mos (4.1-<br>8.4)                                  | N/A       |
| Shah 2020 (65)       | P | 30  | USA             | Breast                                                                                          | 51   | 0  | HR+, HER-, or triple<br>negative                                                              | 0   | 0   | 23  | pembrolizu<br>mab | PD-1   | N/A                                                                        | 15.4 mos<br>(8.2-20.3)                           | 4.0 mos (2-<br>6.4)                                    | N/A       |
| Yarchoan 2020 (66)   | P | 12  | USA             | Colorectal                                                                                      | 58   | 35 | N/A                                                                                           | 0   | 11  | 12  | pembrolizu<br>mab | PD-1   | N/A                                                                        | 213 days<br>(179-441)                            | 82 days (48-<br>97)                                    | 2         |
| Lin 2020 (67)        | P | 40  | USA             | Lung Cancer                                                                                     | 67   | 68 | ADC: 55%                                                                                      | 0   | 0   | 0   | atezolizuma<br>b  | PD-L1  | part I:<br>22.5mos<br>(19.0-29.1)<br>Part II: 15.3<br>mos ( 10.9-<br>20.3) | part I: 22.8<br>Part II: not<br>reached          | Part I: 12.5mo<br>Part II: 13.2mos                     | 32.<br>00 |
| Welsh 2020 (68)      | P | 38  | USA             | Lung Cancer                                                                                     | 62   | 61 | Small cell neuroendocrine:<br>91%                                                             | 0   | 0   | 38  | pembrolizu<br>mab | PD-1   | 7.3mos (1-13)                                                              | 8.4 (6.7-10.1)                                   | 6.1mos (4.1-<br>8.1)                                   | 2.0<br>0  |
| Mahalingam 2020 (69) | P | 11  | USA             | Pancreatic                                                                                      | 64   | 27 | N/A                                                                                           | 4   | 11  | 7   | pembrolizu<br>mab | PD-1   | N/A                                                                        | 3.1 mos (0-<br>8.7)                              | 2.0 mos (0-<br>6.8)                                    | 2.0<br>0  |
| Elbers 2020 (70)     | P | 10  | Netherland<br>s | HNSCC                                                                                           | 69   | 8  | SCC of the oral cavity,<br>oropharynx, hypopharynx<br>or larynx                               | N/A | 9   | N/A | avelumab          | PD-L1  | 12 (8–26)                                                                  | N/A                                              | N/A                                                    | 4         |
| Di Giacomo 2019 (71) | P | 19  | Italy           | melanoma                                                                                        | 58   | 16 | N/A                                                                                           | N/A | N/A | N/A | ipilimumab        | CTLA-4 | 26.3 months                                                                | 26.2 months<br>(95% CI, 3.5–<br>48.9);           | 5.6 months<br>(95% CI, 4.5–<br>6.6)                    | 16        |
| Welsh 2019 (72)      | P | 106 | USA             | Non Melanoma<br>metastatic cancer                                                               | 60   | 50 | ADC 57, SCC 13,<br>Neuroendocrine 9,<br>Sarcoma 7, Adrenocortical<br>5, Other 15              | N/A | 106 | N/A | ipilimumab        | CTLA-4 | 10.5 months                                                                | median<br>overall<br>survival time<br>was not    | 2.9 months                                             | N/A       |
| Gray 2019 (73)       | P | 33  | USA             | Lung Cancer                                                                                     | 68   | 22 | ADC 25, Adenosquamos<br>Carcinoma 1, Squamos<br>cell carcinoma 7                              | N/A | N/A | 27  | pembrolizu<br>mab | PD-1   | 18.2 months                                                                | Immunothera<br>py<br>Refractoty:<br>6.8 (95% CI, | Immuntherapy<br>Refractory:<br>2.8 (95% CI,<br>1.8—not | 7.0<br>0  |
| Qiao 2019 (74)       | P | 11  | China           | pancreatic, gastric,<br>colorectal, cervical,<br>endometrial cancer<br>and peritoneal<br>cancer | N/A  | 45 | pancreatic: 1<br>gastric: 1<br>colorectal: 4<br>cervical:2<br>endometrial: 2<br>Peritoneal: 1 | 6   | 3   | 7   | pembrolizu<br>mab | PD-1   | N/A                                                                        | N/A                                              | N/A                                                    | 0         |

|                           |   |    |          |                                                         |     |     |                                                                                                                                                                                                                                                              |     |     |     |               |        |                   |                             |                             |     |
|---------------------------|---|----|----------|---------------------------------------------------------|-----|-----|--------------------------------------------------------------------------------------------------------------------------------------------------------------------------------------------------------------------------------------------------------------|-----|-----|-----|---------------|--------|-------------------|-----------------------------|-----------------------------|-----|
| Chintakuntlawar 2019 (75) | P | 3  | USA      | Anaplastic thyroid cancer                               | 56  | 33  | Anaplastic thyroid cancer: Sarcomatoid: 1 (33%) Epithelial: 1 (33%) Unspecified: 1 (33%)                                                                                                                                                                     | 2   | 3   | 3   | pembrolizumab | PD-1   | N/a               | 2.76 months                 | N/A                         | 3   |
| Feun 2019 (76)            | P | 29 | USA      | Hepatocellular Carcinoma                                | 67  | 25  | N/A                                                                                                                                                                                                                                                          | N/A | 1   | N/A | pembrolizumab | PD-1   | 17 months         | 13 months                   | 4.5 months                  | 3   |
| Habra 2019 (77)           | P | 16 | USA      | adrenocortical carcinoma                                | 48  | 8   | ACC                                                                                                                                                                                                                                                          | N/A | N/A | N/A | pembrolizumab | PD-1   | N/A               | N/A                         | N/A                         | 1   |
| Cho 2019 (78)             | P | 33 | Korea    | Thymoma=7, Thymic carcinoma=26                          | 57  | 21  | 73.1% SCC                                                                                                                                                                                                                                                    | 11  | 12  | 33  | pembrolizumab | PD-1   | 14.9 months       | N/A                         | 6.1 months (5.3-6.9)        | 0   |
| Chalmers 2019 (79)        | P | 14 | USA      | Lung Cancer (NSCLCs)                                    | N/A | N/A | N/A                                                                                                                                                                                                                                                          | N/A | N/A | N/A | ipilimumab    | CTLA-4 | n/a               | > 42.3 months               | 24.1 month                  | 5   |
| Mego 2019 (80)            | P | 8  | Slovakia | Germ cell tumor                                         | 29  | 100 | 1 embryonal carcinoma, 1 choriocarcinoma, 1 yolk sac tumor, 1 immature                                                                                                                                                                                       | 0   | 0   | 8   | avelumab      | PD-L1  | 2.6 (0.3 to 14.4) | 2.7 months (95% CI 1.0–3.3) | 0.9 months (95% CI 0.5–1.9) | 0   |
| Thomas 2019 (81)          | P | 20 | USA      | Lung Cancer<br>mall Cell Lung Cancer                    | 64  | 45  | N/A                                                                                                                                                                                                                                                          | 1   | 9   | 20  | durvalumab    | PD-L1  | 11.1 months       | 4.1 months                  | 1.8 months                  | N/A |
| Zimmer 2019 (82)          | P | 9  | USA      | 7 ovarian/1 endometrial/1 triple negative breast cancer | 59  | 0   | OvCa (HGSOC/Clear cell/Mixed Mullerian/ Mixed Serous and Endometrioid) 6 (2/2/1/1) Platinum sensitivity in OvCa (sensitive/resistant) 2/5 Primary Peritoneal cancer (platinum-resistant) 1 Endometrial carcinoma (MSI low) 1 Triple Negative Breast Cancer 1 | 0   | 0   | 2   | durvalumab    | PD-L1  | 8 months          | N/A                         | N/A                         | N/A |

[illegible]

|                             |     |    |     |                                                     |      |       |                              |     |     |     |                         |               |                                      |                                                                            |                                                                        |       |
|-----------------------------|-----|----|-----|-----------------------------------------------------|------|-------|------------------------------|-----|-----|-----|-------------------------|---------------|--------------------------------------|----------------------------------------------------------------------------|------------------------------------------------------------------------|-------|
| <b>Kluger 2019 (94)</b>     | P   | 23 | USA | melanoma                                            | 65   | 65    | N/A                          | 12  | 12  | N/A | pembrolizu mab          | PD-1          | 34 months                            | 17 months                                                                  | 2 months                                                               | N/A   |
| <b>Massarelli 2019 (95)</b> | P   | 24 | USA | 22 (92) oropharyngeal cancer, Cervix1 (4) Anus1 (4) | 60   | 83    | N/A                          | N/A | N/A | N/A | nivolumab               | PD-1          | 12.2                                 | 17.5 months                                                                | 2.7 months                                                             | N/A   |
| <b>Parikh 2018 (96)</b>     | P   | 12 | USA | urothelial carcinoma, recurrent or advanced disease | 66   | 8     | urothelial carcinoma         | N/A | N/A | 2   | pembrolizu mab          | PD-1          | Arm A 5.7 months, Arm B 3.7 months   | N/A                                                                        | 4.8 months                                                             | 7.0 0 |
| <b>Maity 2018 (97)</b>      | P   | 24 | USA | Melanoma and others (pancreas and breast)           | 59.7 | 10.42 | N/A                          | 18  | 15  | N/A | pembrolizu mab          | PD-1          | N/A                                  | N/A                                                                        | N/A                                                                    | 8     |
| <b>Amaria 2018 (98)</b>     | RCT | 53 | USA | Melanoma                                            | 52   | 35.8  | Superficial spreading (42%)  | 8   | 1   |     | Nivolumab: + Ipilimumab | PD-1 & CTLA-4 | 15.0 months                          | 100% at 24.4 months with I+N versus 76% (31–94%) at 22.6 mo with N, p=0.18 | 82% at 17.2 months (mo) with I+N versus 58% (27–80%) at 22.6 mo with N | 9     |
| <b>Tobin 2018 (99)</b>      | RCT | 10 | USA | Melanoma                                            | 52.1 | 40    | N/A                          | 0   | 0   | 0   | ipilimumab              | CTLA-4        | group 1 318 days<br>group 2 365 days | N/A                                                                        | N/A                                                                    | 5     |
| <b>Tree 2018 (100)</b>      | P   | 5  | UK  | Urinary Bladder                                     |      |       | N/A                          | N/A | N/A | 5   | pembrolizu mab          | PD-1          | N/A                                  | N/A                                                                        | N/A                                                                    | 2.0 0 |
| <b>Lisberg 2018 (101)</b>   | P   | 11 | USA | Lung Cancer                                         | 58.7 | 36.3  | Squamous 1<br>Non squamos 10 | 0   | 0   | 0   | pembrolizu mab          | PD-1          | 233 days                             | N/A                                                                        | N/A                                                                    | 1     |

|                           |   |    |           |                                                                                                                         |      |      |                                                                                   |     |     |     |                |        |                         |                                    |                         |     |
|---------------------------|---|----|-----------|-------------------------------------------------------------------------------------------------------------------------|------|------|-----------------------------------------------------------------------------------|-----|-----|-----|----------------|--------|-------------------------|------------------------------------|-------------------------|-----|
| Calabrò 2018 (102)        | P | 40 | Italy     | pleural or peritoneal mesothelioma                                                                                      | 64   | 73   | epithelioid: 32 (80%)<br>Sarcomatoid: 2 (5%)<br>Biphasic: 5 (13%)                 | N/A | N/A | N/A | N/A            | N/A    | N/A                     | 16.6 months                        | 5.7 moths               | 7   |
| Luke 2018 (103)           | P | 73 | USA       | Ovarian 9, Lung Cancer 7, breast 6, cholangiocarcinoma 6, endometrial 6, colorectal 5, head and neck 4, others          | 62   | 39.7 | N/A                                                                               | 0   | 69  | 73  | pembrolizu mab | PD-1   | 5.5 months              | 9.6 months                         | PFS was 3.1 months      | 50  |
| Strauss 2018 (104)        | P | 19 | Germany   | adenoid cystic carcinoma 2, anal 2, Appendiceal 1, bronchopulmonary carcinoid 1, cervix 4, chordoma 1, colorectal 2     | 56   | 52.6 | N/A                                                                               | 0   | 0   | 19  | m7824          | PD-L1  | N/A                     | N/A                                | N/A                     | 4   |
| Da Gama Duarte 2018 (105) | P | 5  | Australia | Melanoma                                                                                                                | 59   | 60   | Melanoma                                                                          | 0   | 0   | 3   | ipilimumab     | CTLA-4 | study terminated due to | study terminated due to            | study terminated due to | 2   |
| Giaccone 2018 (106)       | P | 40 | USA       | Thymic carcinoma                                                                                                        | 57   | 70   | SCC 48% ,<br>Poorly differentiated 32%.<br>Neuroendocrine 15%<br>Not specified 5% | 21  | 23  | 40  | pembrolizu mab | PD-1   | 20 months (IQR 14–26)   | 24.9 months (15.5–not reached)     | 4.2(95% CI 2.9–10.3)    | N/A |
| Yang 2018 (107)           | P | 13 | USA       | Lung Cancer                                                                                                             | 61.4 | 38   | ADC:62%,<br>SCC:38%                                                               | 13  | 0   | 13  | ipilimumab     | CTLA-4 | N/A                     | 29.2 (95% CI: 22.1 to not reached) | N/A                     | 5   |
| Sakamuri 2018 (108)       | P | 36 | USA       | Melanoma, Thyroid, Adrenocortical cancer, Adenoid cystic cancer, Leiomyosarcoma, Hodgkin Lymphoma, Renal cancer, Others | 56   | 33   | Hodgkin Lymphoma 7 (19%)                                                          | N/A | N/A | N/A | ipilimumab     | CTLA-4 | N/A                     | N/A                                | N/A                     | N/A |
| Ariyan 2018 (109)         | P | 26 | USA       | Melanoma                                                                                                                | N/A  | 62   | Melanoma                                                                          | N/A | N/A | 26  | ipilimumab     | CTLA-4 | 36 Months               | N/A                                | N/A                     | 10  |

|                       |   |    |         |                                                                     |      |      |                       |     |     |     |                |        |                  |                                  |                             |     |
|-----------------------|---|----|---------|---------------------------------------------------------------------|------|------|-----------------------|-----|-----|-----|----------------|--------|------------------|----------------------------------|-----------------------------|-----|
| Haag 2018 (110)       | P | 25 | Germany | Melanoma                                                            | 64   | 80   | Melanoma              | 24  | 5   | 9   | ipilimumab     | CTLA-4 | 4.56(2.2---14.2) | 22.7 (95% CI 9.5-Not reached)    | 2.9 (95% CI 2.5e8.1)        | 9   |
| Weiss 2018 (111)      | P | 17 | USA     | Pancreatic Cancer                                                   | 55   | 35.3 | ADC                   | 2   | 1   | 4   | pembrolizu mab | PD-1   | N/A              | 15 (95%CI, 6.8----22.6)          | 9.1(95%CI, 4.9---15.3)      | 12  |
| Shoushtari 2018 (112) | P | 64 | USA     | Melanoma                                                            | 56   | 50   | Melanoma              | 3   | 3   | N/A | N/A            | N/A    | 14 months        | N/A                              | N/A                         | 38  |
| Patel 2017 (113)      | P | 64 | USA     | Melanoma                                                            | 62   | 70   | Melanoma              | 0   | 0   | N/A | ipilimumab     | CTLA-4 | 20 months (2–60) | Not reached                      | 5                           | N/A |
| Ben-Ami 2017 (114)    | P | 12 | Israel  | Uterus                                                              | 54.5 | N/A  | Leiomyosarcoma        | N/A | N/A | N/A | nivolumab      | PD-1   | Not reported     | Because of the small sample size | 1.8 months (95% CI 0.1-3.5) | N/A |
| Qin 2017 (115)        | P | 24 | USA     | Lung                                                                | 64   | 24   | NSCLC                 | N/A | 18  | 24  | pembrolizu mab | PD-1   | 9.2 months       | Not reported                     | Not reported                | N/A |
| Weiss 2017 (116)      | P | 49 | USA     | Breast, pancreatic, NSCLC, Sarcoma, SCLC, ovarian cancer, and other | 55   | 13   | Breast cancer         | 19  | 16  | 2   | pembrolizu mab | PD-1   | N/A              | 10.46 months                     | N/A                         | N/A |
| DAngelo 2017 (117)    | P | 28 | USA     | Gastric                                                             | 56   | 17   | GIST & other sarcomas | N/A | N/A | N/A | ipilimumab     | CTLA-4 | 17.5 months      | 13.5 months                      | 2.8 months                  | N/A |
| Reilley 2017 (118)    | P | 35 | USA     | Gastric, Renal, Skin & Lung                                         | 57.5 | 23   | Melanoma              | N/A | N/A | N/A | ipilimumab     | CTLA-4 | Not reported     | Not reported                     | N/A                         | N/A |
| Weide 2017 (119)      | P | 15 | Germany | Skin                                                                | 54   | 9    | Melanoma              | N/A | N/A | 4   | ipilimumab     | CTLA-4 | 231 days         | 12 months                        | N/A                         | N/A |
| Yamamoto 2017 (120)   | P | 17 | Japan.  | Colorectal. Lung                                                    | N/A  | 10   | ADC                   | 12  | 5   | 16  | nivolumab      | PD-1   | 24 months        | Not reported                     | N/A                         | N/A |

|                           |   |     |            |                                                |      |     |                                          |     |     |     |                |        |                                              |                              |                               |     |
|---------------------------|---|-----|------------|------------------------------------------------|------|-----|------------------------------------------|-----|-----|-----|----------------|--------|----------------------------------------------|------------------------------|-------------------------------|-----|
| Brustugun 2017 (121)      | P | 58  | Norway     | Lung cancer                                    | 64.6 | 28  | ADC 32 (55.2)                            | N/A | N/A | N/A | nivolumab      | PD-1   | 14.3 months                                  | 11.7 months                  | N/A                           | N/A |
| Duffy 2017 (122)          | P | 32  | USA        | Liver cancer                                   | 61   | 28  | Hepatocellular carcinoma                 | 5   | 5   |     | tremelimum ab  | CTLA-4 | 18.8 months                                  | 12.3 months                  | Six and 12-month tumor        | N/A |
| Kanda 2016 (123)          | P | 24  | Japan      | Lung cancer                                    | 63   | 17  | NSCLC                                    | N/A | N/A | N/A | nivolumab      | PD-1   | 6.23 months (range, 2.04–                    | Not reported                 | 6.28 months in arm A, 9.63    | N/A |
| Ray 2016 (124)            | P | 12  | United     | Skin cancer                                    | 63.5 | 6   | Melanoma                                 | N/A | N/A | N/A | ipilimumab     | CTLA-4 | N/A                                          | >31 months                   | N/A                           | N/A |
| Graff 2016 (125)          | P | 10  | USA        | prostate cancer                                | 72   | 10  | ADC                                      | N/A | N/A | N/A | pembrolizu mab | PD-1   | 7.5 months                                   | N/A                          | Three patients remain free of | N/A |
| Bjoern 2016 (126)         | P | 10  | Denmark    | Skin cancer                                    | 51.1 | 8   | Melanoma                                 | N/A | N/A | N/A | ipilimumab     | CTLA-4 | N/A                                          | N/A                          | N/A                           | N/A |
| Goldberg 2016 (127)       | P | 36  | USA        | skin and lung cancer                           | 62   | 18  | Melanoma and NSCLC                       | 24  | 9   | N/A | pembrolizu mab | PD-1   | Melanoma>> 11.6 months. NSCLC>> 11.6 months. | Melanoma was not             | N/A                           | N/A |
| Wilgenhof 2016 (128)      | P | 39  | Netherland | skin cancer                                    | 46   | 23  | Melanoma                                 | N/A | 22  | 18  | ipilimumab     | CTLA-4 | 36 months                                    | 14.75 months                 | 6.75 months                   | N/A |
| Weber 2016 (129)          | P | 126 | USA        | Skin cancer                                    | 60   | 60  | Melanoma                                 | N/A | N/A | 47  | nivolumab      | PD-1   | 16 months                                    | 20.6 months                  | 5.3 months                    | N/A |
| Merchant 2016 (130)       | P | 33  | USA        | Metastatic skin cancer from many solid tumors. | N/A  | 14  | Melanoma Sarcoma Renal/bladder carcinoma | N/A | 17  | 23  | ipilimumab     | CTLA-4 | Not reported                                 | irAE n= 14 >> 100 % 3months, | N/A                           | N/A |
| Freeman-Keller 2016 (131) | P | 159 | USA        | Skin                                           | N/A  | N/A | Melanoma                                 | N/A | N/A | N/A | nivolumab      | PD-1   | 35months                                     | 16.8 months                  | N/A                           | N/A |
| Hamanishi 2015 (132)      | P | 20  | Japan      | Ovarian cancer                                 | 61.1 | 0   | Serous>                                  | N/A | N/A | 20  | nivolumab      | PD-1   | 11.0 months                                  | 20 months.                   | 3.5 months                    | N/A |
| Horinouchi 2015 (133)     | P | 15  | Japan.     | Lung cancer                                    | 61   | 12  | NSCLC                                    | N/A | N/A | N/A | ipilimumab     | CTLA-4 | N/A                                          | 9 months                     | N/A                           | N/A |

|                       |     |    |        |                    |      |    |               |     |     |     |               |        |               |                     |              |     |
|-----------------------|-----|----|--------|--------------------|------|----|---------------|-----|-----|-----|---------------|--------|---------------|---------------------|--------------|-----|
| Calabrò 2015 (134)    | P   | 29 | Italy. | Lung cancer        | 65   | 20 | Mesothelioma  | N/A | N/A | 15  | tremelimum ab | CTLA-4 | 21·3 months   | 11.3 months         | 6.2 months   | 2   |
| Hodi 2014 (135)       | P   | 46 | USA    | Skin cancer        | 58   | 28 | Melanoma      | N/A | 20  | 29  | ipilimumab    | CTLA-4 | 17.3 months   | 25.1 months.        | N/A          | N/A |
| Weber 2013 (136)      | P   | 90 | USA    | Skin cancer        | N/A  | 58 | Melanoma      | N/A | N/A | N/A | nivolumab     | PD-1   | 8.1 months    | N/A                 | N/A          | N/A |
| Calabrò 2013 (137)    | P   | 29 | Italy. | Skin cancer        | 64   | 21 | Mesothelioma. | N/A | N/A | 25  | tremelimum ab | CTLA-4 | 27 months     | 10.7 months         | 6.2 months   | N/A |
| Le 2013 (138)         | RCT | 30 | USA    | Pancreatic cancer  | 62   | 20 | ADC.          | N/A | N/A | 28  | ipilimumab    | CTLA-4 | 25 months     | 4.3 months          | Not reported | N/A |
| McNeel 2012 (139)     | P   | 11 | USA    | Prostatic cancer   | 63   | 11 | ADC.          | 9   | 6   | N/A | tremelimum ab | CTLA-4 | 15 months     | N/A                 | N/A          | N/A |
| Madan 2012 (140)      | P   | 30 | USA    | Prostatic cancer   | 69   | 30 | ADC.          | N/A | N/A | 6   | ipilimumab    | CTLA-4 | Not reported. | 34·4 months         | 3·9 months   | N/A |
| Di Giacomo 2011 (141) | P   | 27 | Italy. | Skin cancer        | 55   | 14 | Melanoma      | N/A | N/A | N/A | ipilimumab    | CTLA-4 | 8.5 months    | 9.6 months          | 29 months    | N/A |
| Royal 2010 (142)      | P   | 27 | USA    | Pancreatic cancer  | 55   | 15 | ADC.          | 24  | 12  | 20  | ipilimumab    | CTLA-4 | N/A           | 10.9 months         | N/A          | N/A |
| Ralph 2010 (143)      | P   | 18 | UK     | Gastric/esophageal | 56   | 14 | ADC           | N/A | N/A | 18  | tremelimum ab | CTLA-4 | N/A           | Median survival for | N/A          | N/A |
| Yang 2007 (144)       | P   | 40 | USA    | Renal cancer       | N/A  | 28 | RCC           | 39  | N/A | 2   | ipilimumab    | CTLA-4 | N/A           | N/A                 | N/A          | 17  |
| Maker 2006 (145)      | P   | 46 | USA    | Skin Cancer        | 48   | 32 | Melanoma      | 46  | 14  | 28  | ipilimumab    | CTLA-4 | N/A           | N/A                 | N/A          | N/A |
| Reuben 2006 (146)     | P   | 30 | USA    | Skin Cancer        | 58   | 19 | Melanoma      | 2   | 11  | 17  | ticilimumab   | CTLA-4 | N/A           | N/A                 | N/A          | N/A |
| Maker 2005 (147)      | P   | 36 | USA    | Skin Cancer        | 47.1 | 22 | Melanoma      | 36  | 7   | 8   | ipilimumab    | CTLA-4 | N/A           | N/A                 | N/A          | N/A |

ACC: adenoid cystic carcinoma, ADC: Adenocarcinoma, CTH: chemotherapy, HEENT: Head, Eyes, Ears, Nose, & Throat, HNSCC: Head & Neck squamous cell carcinoma, HCC: hepatocellular carcinoma, NSCLC: Non-small cell lung cancer, NOS: Not Otherwise Specified, P: Prospective, RCT: Randomized Controlled Trial, R: Retrospective SCC: squamous cell carcinoma, TC: thymic carcinoma, UC: Urothelial carcinoma.



**Supplementary Table S4:** Summary of criteria of different variables included in meta-analysis

|                            | Average | SD   | Median | Min  | Max  |
|----------------------------|---------|------|--------|------|------|
| Study period (years)       | 1.75    | 1.16 | 1.42   | 0.25 | 7.33 |
| Age                        | 59.22   | 8.44 | 60.75  | 19   | 72   |
| Males (%)                  | 47.64   | -    | -      | 0    | 100  |
| Underwent surgery (%)      | 31.2    | -    | -      | 0    | 100  |
| Underwent radiotherapy (%) | 17.2    | -    | -      | 0    | 100  |
| Underwent chemotherapy (%) | 16.15   | -    | -      | 0    | 100  |

**Supplementary Table S5:** List of the 45 excluded studies for the sensitivity analysis

|                |                 |               |                     |                 |
|----------------|-----------------|---------------|---------------------|-----------------|
| Aamdal 2021    | Awada 2020      | Bjoern 2016   | Chalmers 2019       | Chang 2021      |
| Chu 2021       | Chung 2019      | DAngelo 2017  | Da Gama Duarte 2018 | Di Giacomo 2019 |
| Duffy 2017     | Graff 2020      | Graff 2016    | Gray 2019           | Haag 2018       |
| Hodi 2014      | Kawazoe 2020    | Kelly 2020    | Kim 2020            | Kitano 2021     |
| Lam 2021       | Le 2013         | Liu 2020      | Madan 2012          | Mahalingam 2020 |
| Maker 2005     | Massarelli 2019 | ONeill 2020   | Ray 2016            | Reilley 2017    |
| Rodriguez 2020 | Rozeman 2020    | Sahebjam 2021 | Sakamuri 2018       | Shenderov 2021  |
| Thomas 2019    | Weber 2013      | Weide 2017    | Wilgenhof 2016      | Wilky 2019      |
| Xie 2020       | Yarchoan 2020   | Yuan 2021     | Zamarin 2020        | Zimmer 2019     |

\*Studies in gray were added to the first 33 excluded studies (in white)

**Supplementary Table S6:** Subgroup analysis of pooled events rates in A) adverse events (AE) 3-4 and B) AE 5 by ITH drugs

| A) AE 3-4     |            |                        |                     | B) AE 5       |            |                      |                     |
|---------------|------------|------------------------|---------------------|---------------|------------|----------------------|---------------------|
| ITH drug      | N. Studies | PER (95% CI)           | Subgroup difference | ITH drug      | N. Studies | PER (95% CI)         | Subgroup difference |
| Pembrolizumab | 33         | 20.73% (13.92-29.71) ¶ | p=0.1160            | Pembrolizumab | 38         | 2.90% (1.96-4.29) ¶¶ | p=0.9798            |
| Ipilimumab    | 13         | 42.20% (31.14-54.12) ¶ |                     | Ipilimumab    | 24         | 2.50% (1.47-4.23) ¶¶ |                     |
| Nivolumab     | 5          | 21.92% (4.80-60.99)    |                     | Nivolumab     | 10         | 2.95% (0.98-8.56)    |                     |
| Atezolizumab  | 3          | 42.40% (5.44-90.41)    |                     | Atezolizumab  | 3          | 2.54% (0.63-9.61)    |                     |
| Toripalimab   | 3          | 10.78% (0.32-82.18)    |                     | Camrelizumab  | 3          | 1.49% (0.30-7.04)    |                     |
| Avelumab      | 2          | 21.94% (2.80-73.28)    |                     | Durvalumab    | 3          | 1.07% (0.22-5.12)    |                     |
| Camrelizumab  | 2          | 46.87% (11.70-85.46)   |                     | Tremelimumab  | 3          | 3.02% (0.75-11.34)   |                     |
| Durvalumab    | 2          | 24.32% (14.30-38.24)   |                     | Avelumab      | 2          | 2.22% (0.31-14.28)   |                     |
| Sintilimab    | 2          | 27.14% (3.49-79.31)    |                     | Sintilimab    | 2          | 4.84% (1.57-13.97)   |                     |
| Cemiplimab    | 1          | 30.77% (12.04-59.07)   |                     | Toripalimab   | 2          | 1.51% (0.21-9.97)    |                     |
| M7824         | 1          | 21.05% (8.13-44.55)    |                     | Cemiplimab    | 1          | 3.57% (0.22-38.39)   |                     |
| Tremelimumab  | 1          | 6.9% (1.73-23.75)      |                     | M7824         | 1          | 2.50% (0.15-29.81)   |                     |

¶ Subgroup analysis of AE 3-4 of Pembrolizumab and Ipilimumab was p=0.0030

¶¶ Subgroup analysis of AE 5 of Pembrolizumab and Ipilimumab was p=0.6563

AE: adverse events, PER: pooled events rate

**Supplementary Table S7:** Subgroup analysis of pooled events rates A) adverse events (AE) 3-4 and B) AE 5 by ITH class

|             | A) AE 3-4  |                      |                     | B) AE 5    |                   |                     |
|-------------|------------|----------------------|---------------------|------------|-------------------|---------------------|
| ITH drug    | N. Studies | PER (95% CI)         | Subgroup difference | N. Studies | PER (95% CI)      | Subgroup difference |
| Anti PD-1   | 46         | 22.16% (15.81-30.15) | p=0.0610            | 56         | 3.17% (2.31-4.35) | p=0.4817            |
| Anti PD-L1  | 8          | 30.15% (14.43-52.49) |                     | 9          | 1.90% (0.79-4.49) |                     |
| Anti CTLA-4 | 14         | 38.64% (27.39-51.26) |                     | 27         | 2.56% (1.56-4.18) |                     |

AE: adverse events, CTL A-4: cytotoxic T lymphocyte antigen 4, PD-1: programmed cell death 1 and PD-L1: programmed cell death 1 ligand 1, PER: pooled events rate

**Supplementary Table S8:** Subgroup analysis of primary outcomes on lung cancer only vs pancreatic cancer only vs all other cancers

| Outcome                | Group      | Patients | Studies | PER (95%CI)           | Heterogeneity (I <sup>2</sup> , p-value) | Subgroup, p-value |
|------------------------|------------|----------|---------|-----------------------|------------------------------------------|-------------------|
| Any grade irAE         | Lung       | 545      | 17      | 74.81% [61.90; 84.45] | 83.8%, p<0.0001                          | 0.0113            |
|                        | Pancreatic | 97       | 4       | 96.19% [87.59; 98.90] | 0%, p=0.5642                             |                   |
|                        | Others     | 1341     | 44      | 79.48% [70.03; 86.52] | 87.1%, p<0.0001                          |                   |
| Grade 3-4 irAE         | Lung       | 762      | 22      | 18.26% [11.13; 28.48] | 84.5%, p<0.0001                          | 0.0207            |
|                        | Pancreatic | 118      | 5       | 53.17% [28.56; 76.33] | 81.0%, p=0.0003                          |                   |
|                        | Others     | 1414     | 49      | 29.48% [23.05; 36.83] | 81.1%, p<0.0001                          |                   |
| Grade 5 irAE           | Lung       | 734      | 22      | 2.38% [1.43; 3.95]    | 0%, p=0.9995                             | 0.9134            |
|                        | Pancreatic | 315      | 7       | 3.28% [0.80; 12.50]   | 61.3%, p=0.0166                          |                   |
|                        | Others     | 2227     | 71      | 2.51% [1.85; 3.39]    | 0%, p=0.9996                             |                   |
| Cardiac-related irAE   | Lung       | 961      | 29      | 2.76% [1.58; 4.77]    | 34.2%, p=0.0383                          | 0.6213            |
|                        | Pancreatic | 345      | 8       | 1.73% [0.65; 4.53]    | 0%, p=0.8948                             |                   |
|                        | Others     | 3004     | 95      | 2.85% [2.19; 3.72]    | 7.6%, p=0.2758                           |                   |
| Pulmonary-related irAE | Lung       | 961      | 29      | 7.42% [5.17; 10.53]   | 41.1%, p=0.0120                          | 0.0059            |
|                        | Pancreatic | 345      | 8       | 1.91% [0.80; 4.52]    | 0%, p=0.8980                             |                   |
|                        | Others     | 3004     | 95      | 4.53% [3.71; 5.52]    | 0%, p=0.5814                             |                   |

## References

- (1) Lam, T.; Tsang, K.; Choi, H.; Lee, V.; Lam, K.; Chiang, C.; So, T.; Chan, W.; Nyaw, S.; Lim, F. Combination atezolizumab, bevacizumab, pemetrexed and carboplatin for metastatic EGFR mutated NSCLC after TKI failure. *Lung Cancer* **2021**, *159*, 18-26.
- (2) Edenfield, W. J.; Chung, K.; O'Rourke, M.; Cull, E.; Martin, J.; Bowers, H.; Smith, W.; Gluck, W. L. A phase II study of durvalumab in combination with tremelimumab in patients with rare cancers. *The Oncologist* **2021**, *26* (9), e1499-e1507.
- (3) Ferrarotto, R.; Sousa, L. G.; Qing, Y.; Kaya, D.; Stephen, B.; Jain, D.; Bell, D.; Pant, S.; Tsimberidou, A. M.; Janku, F. Pembrolizumab in patients with refractory cutaneous squamous cell carcinoma: a phase II trial. *Advances in Therapy* **2021**, *38* (8), 4581-4591.
- (4) Zhu, X.; Cao, Y.; Liu, W. Stereotactic body radiotherapy plus pembrolizumab and trametinib versus stereotactic body radiotherapy plus gemcitabine for locally recurrent pancreatic cancer after surgical resection: an open-label, randomised, controlled, phase 2 trial (Retraction of Vol 22, Pg 1093, 2021). ELSEVIER SCIENCE INC STE 800, 230 PARK AVE, NEW YORK, NY 10169 USA: 2022.
- (5) Reschke, R.; Gussek, P.; Boldt, A.; Sack, U.; Köhl, U.; Lordick, F.; Gora, T.; Kreuz, M.; Reiche, K.; Simon, J.-C. Distinct immune signatures indicative of treatment response and immune-related adverse events in melanoma patients under immune checkpoint inhibitor therapy. *International journal of molecular sciences* **2021**, *22* (15), 8017.
- (6) Chang, K.-Y.; Chiang, N.-J.; Wu, S.-Y.; Yen, C.-J.; Chen, S.-H.; Yeh, Y.-M.; Li, C.-F.; Feng, X.; Wu, K.; Johnston, A. Phase 1b study of pegylated arginine deiminase (ADI-PEG 20) plus Pembrolizumab in advanced solid cancers. *Oncoimmunology* **2021**, *10* (1), 1943253.
- (7) Zhang, W.; Yan, C.; Gao, X.; Li, X.; Cao, F.; Zhao, G.; Zhao, J.; Er, P.; Zhang, T.; Chen, X. Safety and feasibility of radiotherapy plus camrelizumab for locally advanced esophageal squamous cell carcinoma. *The oncologist* **2021**, *26* (7), e1110-e1124.
- (8) Tsimberidou, A.-M.; Vo, H. H.; Subbiah, V.; Janku, F.; Piha-Paul, S.; Yilmaz, B.; Gong, J.; Naqvi, M. F.; Tu, S.-M.; Campbell, M. Pembrolizumab in patients with advanced metastatic germ cell tumors. *The Oncologist* **2021**, *26* (7), 558-e1098.
- (9) Marcq, G.; Souhami, L.; Cury, F. L.; Salimi, A.; Aprikian, A.; Tanguay, S.; Vanhuyse, M.; Rajan, R.; Brimo, F.; Mansure, J. J. Phase 1 trial of atezolizumab plus trimodal therapy in patients with localized muscle-invasive bladder cancer. *International Journal of Radiation Oncology\* Biology\* Physics* **2021**, *110* (3), 738-741.
- (10) Altorki, N. K.; McGraw, T. E.; Borczuk, A. C.; Saxena, A.; Port, J. L.; Stiles, B. M.; Lee, B. E.; Sanfilippo, N. J.; Scheff, R. J.; Pua, B. B. Neoadjuvant durvalumab with or without stereotactic body radiotherapy in patients with early-stage non-small-cell lung cancer: a single-centre, randomised phase 2 trial. *The Lancet Oncology* **2021**, *22* (6), 824-835.
- (11) Aamdal, E.; Inderberg, E. M.; Ellingsen, E. B.; Rasch, W.; Brunsvig, P. F.; Aamdal, S.; Heintz, K.-M.; Vodák, D.; Nakken, S.; Hovig, E. Combining a universal telomerase based cancer vaccine with ipilimumab in patients with metastatic melanoma-five-year follow up of a phase I/IIa trial. *Frontiers in Immunology* **2021**, *12*, 663865.
- (12) Di Noia, V.; D'Argento, E.; Pilotto, S.; Vita, E.; Ferrara, M. G.; Damiano, P.; Ribelli, M.; Cannella, A.; Virtuoso, A.; Fattorossi, A. Blood serum amyloid A as potential biomarker of pembrolizumab efficacy for patients affected by advanced non-small cell lung cancer overexpressing PD-L1: results of the exploratory "FoRECATT" study. *Cancer Immunology, Immunotherapy* **2021**, *70*, 1583-1592.
- (13) Shenderov, E.; Boudadi, K.; Fu, W.; Wang, H.; Sullivan, R.; Jordan, A.; Dowling, D.; Harb, R.; Schonhoft, J.; Jendrisak, A. Nivolumab plus ipilimumab, with or without enzalutamide, in AR-V7-expressing metastatic castration-resistant prostate cancer: A phase-2 nonrandomized clinical trial. *The Prostate* **2021**, *81* (6), 326-338.
- (14) Sahebjam, S.; Forsyth, P. A.; Tran, N. D.; Arrington, J. A.; Macaulay, R.; Etame, A. B.; Walko, C. M.; Boyle, T.; Peguero, E. N.; Jaglal, M. Hypofractionated stereotactic re-irradiation with pembrolizumab and bevacizumab in patients with recurrent high-grade gliomas: results from a phase I study. *Neuro-oncology* **2021**, *23* (4), 677-686.
- (15) Chu, T.; Zhong, R.; Zhong, H.; Zhang, B.; Zhang, W.; Shi, C.; Qian, J.; Zhang, Y.; Chang, Q.; Zhang, X. Phase 1b study of sintilimab plus anlotinib as first-line therapy in patients with advanced NSCLC. *Journal of Thoracic Oncology* **2021**, *16* (4), 643-652.

- (16) Ma, Y.; Fang, W.; Zhao, H.; Bathena, S. P.; Tendolkar, A.; Sheng, J.; Zhang, L. A Phase I Dose Escalation Study of the Safety, Tolerability, and Pharmacokinetics of Ipilimumab in Chinese Patients with Select Advanced Solid Tumors. *The Oncologist* **2021**, *26* (4), e549-e566.
- (17) Cascone, T.; William Jr, W. N.; Weissferdt, A.; Leung, C. H.; Lin, H. Y.; Pataer, A.; Godoy, M. C.; Carter, B. W.; Federico, L.; Reuben, A. Neoadjuvant nivolumab or nivolumab plus ipilimumab in operable non-small cell lung cancer: the phase 2 randomized NEOSTAR trial. *Nature medicine* **2021**, *27* (3), 504-514.
- (18) Eichhorn, F.; Klotz, L. V.; Kriegsmann, M.; Bischoff, H.; Schneider, M. A.; Muley, T.; Kriegsmann, K.; Haberkorn, U.; Heussel, C. P.; Savai, R. Neoadjuvant anti-programmed death-1 immunotherapy by pembrolizumab in resectable non-small cell lung cancer: First clinical experience. *Lung Cancer* **2021**, *153*, 150-157.
- (19) Pelster, M. S.; Gruschkus, S. K.; Bassett, R.; Gombos, D. S.; Shephard, M.; Posada, L.; Glover, M. S.; Simien, R.; Diab, A.; Hwu, P. Nivolumab and ipilimumab in metastatic uveal melanoma: results from a single-arm phase II study. *Journal of Clinical Oncology* **2021**, *39* (6), 599.
- (20) Sarfaty, M.; Whiting, K.; Teo, M. Y.; Lee, C. H.; Peters, V.; Durocher, J.; Regazzi, A. M.; McCoy, A. S.; Hettich, G.; Jungbluth, A. A. A phase II trial of durvalumab and tremelimumab in metastatic, non-urothelial carcinoma of the urinary tract. *Cancer Medicine* **2021**, *10* (3), 1074-1083.
- (21) Yuan, Y.; Lee, J. S.; Yost, S. E.; Frankel, P. H.; Ruel, C.; Egelston, C. A.; Guo, W.; Gillece, J. D.; Folkerts, M.; Reining, L. A phase II clinical trial of pembrolizumab and enobosarm in patients with androgen receptor-positive metastatic triple-negative breast cancer. *The Oncologist* **2021**, *26* (2), 99-e217.
- (22) Perez, B. A.; Kim, S.; Wang, M.; Karimi, A. M.; Powell, C.; Li, J.; Dilling, T. J.; Chiappori, A.; Latifi, K.; Rose, T. Prospective single-arm phase 1 and 2 study: ipilimumab and nivolumab with thoracic radiation therapy after platinum chemotherapy in extensive-stage small cell lung cancer. *International Journal of Radiation Oncology\* Biology\* Physics* **2021**, *109* (2), 425-435.
- (23) Maity, A.; Mick, R.; Rengan, R.; Mitchell, T. C.; Amaravadi, R. K.; Schuchter, L. M.; Pryma, D. A.; Patsch, D. M.; Maity, A. P.; Minn, A. J. A stratified phase I dose escalation trial of hypofractionated radiotherapy followed by ipilimumab in metastatic melanoma: long-term follow-up and final outcomes. *Oncoimmunology* **2021**, *10* (1), 1863631.
- (24) Kitano, S.; Shimizu, T.; Koyama, T.; Ebata, T.; Iwasa, S.; Kondo, S.; Shimomura, A.; Fujiwara, Y.; Yamamoto, N.; Paccaly, A. Dose exploration results from Phase 1 study of cemiplimab, a human monoclonal programmed death (PD)-1 antibody, in Japanese patients with advanced malignancies. *Cancer Chemotherapy and Pharmacology* **2021**, *87*, 53-64.
- (25) Mahmood, U.; Bang, A.; Chen, Y.-H.; Mak, R. H.; Lorch, J. H.; Hanna, G. J.; Nishino, M.; Manuszak, C.; Thrash, E. M.; Severgnini, M. A randomized phase 2 study of pembrolizumab with or without radiation in patients with recurrent or metastatic adenoid cystic carcinoma. *International Journal of Radiation Oncology\* Biology\* Physics* **2021**, *109* (1), 134-144.
- (26) Pakkala, S.; Higgins, K.; Chen, Z.; Sica, G.; Steuer, C.; Zhang, C.; Zhang, G.; Wang, S.; Hossain, M. S.; Nazha, B. Durvalumab and tremelimumab with or without stereotactic body radiation therapy in relapsed small cell lung cancer: a randomized phase II study. *Journal for Immunotherapy of Cancer* **2020**, *8* (2).
- (27) Majd, N.; Waguespack, S. G.; Janku, F.; Fu, S.; Penas-Prado, M.; Xu, M.; Alshawa, A.; Kamiya-Matsuoka, C.; Raza, S. M.; McCutcheon, I. E. Efficacy of pembrolizumab in patients with pituitary carcinoma: report of four cases from a phase II study. *Journal for Immunotherapy of Cancer* **2020**, *8* (2).
- (28) van Dijk, N.; Gil-Jimenez, A.; Silina, K.; Hendricksen, K.; Smit, L. A.; de Feijter, J. M.; van Montfoort, M. L.; van Rooijen, C.; Peters, D.; Broeks, A. Preoperative ipilimumab plus nivolumab in locoregionally advanced urothelial cancer: the NABUCCO trial. *Nature medicine* **2020**, *26* (12), 1839-1844.
- (29) Gao, J.; Navai, N.; Alhalabi, O.; Siefker-Radtke, A.; Campbell, M. T.; Tidwell, R. S.; Guo, C. C.; Kamat, A. M.; Matin, S. F.; Araujo, J. C. Neoadjuvant PD-L1 plus CTLA-4 blockade in patients with cisplatin-ineligible operable high-risk urothelial carcinoma. *Nature medicine* **2020**, *26* (12), 1845-1851.
- (30) Welsh, J. W.; Heymach, J. V.; Guo, C.; Menon, H.; Klein, K.; Cushman, T. R.; Verma, V.; Hess, K. R.; Shroff, G.; Tang, C. Phase 1/2 trial of pembrolizumab and concurrent chemoradiation therapy for limited-stage SCLC. *Journal of Thoracic Oncology* **2020**, *15* (12), 1919-1927.
- (31) Duska, L. R.; Scalici, J. M.; Temkin, S. M.; Schwarz, J. K.; Crane, E. K.; Moxley, K. M.; Hamilton, C. A.; Wethington, S. L.; Petroni, G. R.; Varhegyi, N. E. Results of an early safety analysis of a study of the combination of pembrolizumab and pelvic chemoradiation in locally advanced cervical cancer. *Cancer* **2020**, *126* (22), 4948-4956.

- (32) Schweizer, C.; Schubert, P.; Rutzner, S.; Eckstein, M.; Haderlein, M.; Lettmaier, S.; Semrau, S.; Gostian, A.-O.; Frey, B.; Gaipl, U. S. Prospective evaluation of the prognostic value of immune-related adverse events in patients with non-melanoma solid tumour treated with PD-1/PD-L1 inhibitors alone and in combination with radiotherapy. *European Journal of Cancer* **2020**, *140*, 55-62.
- (33) Takahashi, A.; Namikawa, K.; Ogata, D.; Nakano, E.; Jinnai, S.; Nakama, K.; Tsutsui, K.; Muto, Y.; Mizuta, H.; Yamazaki, N. Real-world efficacy and safety data of nivolumab and ipilimumab combination therapy in Japanese patients with advanced melanoma. *The Journal of Dermatology* **2020**, *47* (11), 1267-1275.
- (34) Awada, G.; Salama, L. B.; De Cremer, J.; Schwarze, J. K.; Fischbuch, L.; Seynaeve, L.; Du Four, S.; Vanbinst, A.-M.; Michotte, A.; Everaert, H. Axitinib plus avelumab in the treatment of recurrent glioblastoma: a stratified, open-label, single-center phase 2 clinical trial (GliAvAx). *Journal for immunotherapy of cancer* **2020**, *8* (2).
- (35) Welsh, J.; Menon, H.; Chen, D.; Verma, V.; Tang, C.; Altan, M.; Hess, K.; De Groot, P.; Nguyen, Q.-N.; Varghese, R. Pembrolizumab with or without radiation therapy for metastatic non-small cell lung cancer: a randomized phase I/II trial. *Journal for immunotherapy of cancer* **2020**, *8* (2).
- (36) Wang, Z.; Ying, J.; Xu, J.; Yuan, P.; Duan, J.; Bai, H.; Guo, C.; Li, L.; Yang, Z.; Wan, R. Safety, Antitumor Activity, and Pharmacokinetics of Toripalimab, a Programmed Cell Death 1 Inhibitor, in Patients With Advanced Non–Small Cell Lung Cancer: A Phase 1 Trial. *JAMA network open* **2020**, *3* (10), e2013770-e2013770.
- (37) Schoenfeld, J. D.; Hanna, G. J.; Jo, V. Y.; Rawal, B.; Chen, Y.-H.; Catalano, P. S.; Lako, A.; Ciantra, Z.; Weirather, J. L.; Criscitiello, S. Neoadjuvant nivolumab or nivolumab plus ipilimumab in untreated oral cavity squamous cell carcinoma: a phase 2 open-label randomized clinical trial. *JAMA oncology* **2020**, *6* (10), 1563-1570.
- (38) O'Neill, C.; Hayat, T.; Hamm, J.; Healey, M.; Zheng, Q.; Li, Y.; Martin II, R. C. A phase 1b trial of concurrent immunotherapy and irreversible electroporation in the treatment of locally advanced pancreatic adenocarcinoma. *Surgery* **2020**, *168* (4), 610-616.
- (39) Frumovitz, M.; Westin, S. N.; Salvo, G.; Zarifa, A.; Xu, M.; Yap, T. A.; Rodon, A. J.; Karp, D. D.; Abonofal, A.; Jazaeri, A. A. Phase II study of pembrolizumab efficacy and safety in women with recurrent small cell neuroendocrine carcinoma of the lower genital tract. *Gynecologic oncology* **2020**, *158* (3), 570-575.
- (40) Ratnayake, G.; Reinwald, S.; Shackleton, M.; Moore, M.; Voskoboynik, M.; Ruben, J.; van Zelm, M. C.; Yu, D.; Ward, R.; Smith, R. Stereotactic radiation therapy combined with immunotherapy against metastatic melanoma: long-term results of a phase 1 clinical trial. *International Journal of Radiation Oncology\* Biology\* Physics* **2020**, *108* (1), 150-156.
- (41) Boutros, C.; Chaput-Gras, N.; Lanoy, E.; Larive, A.; Mateus, C.; Routier, E.; Sun, R.; Tao, Y. G.; Massard, C.; Bahleda, R. Dose escalation phase 1 study of radiotherapy in combination with anti-cytotoxic-T-lymphocyte-associated antigen 4 monoclonal antibody ipilimumab in patients with metastatic melanoma. *Journal for Immunotherapy of Cancer* **2020**, *8* (2).
- (42) Kawazoe, A.; Fukuoka, S.; Nakamura, Y.; Kuboki, Y.; Wakabayashi, M.; Nomura, S.; Mikamoto, Y.; Shima, H.; Fujishiro, N.; Higuchi, T. Lenvatinib plus pembrolizumab in patients with advanced gastric cancer in the first-line or second-line setting (EPOC1706): an open-label, single-arm, phase 2 trial. *The Lancet Oncology* **2020**, *21* (8), 1057-1065.
- (43) Wei, X. L.; Ren, C.; Wang, F. H.; Zhang, Y.; Zhao, H. Y.; Zou, B. Y.; Wang, Z. Q.; Qiu, M. Z.; Zhang, D. S.; Luo, H. Y. A phase I study of toripalimab, an anti-PD-1 antibody, in patients with refractory malignant solid tumors. *Cancer Communications* **2020**, *40* (8), 345-354.
- (44) Brastianos, P. K.; Lee, E. Q.; Cohen, J. V.; Tolaney, S. M.; Lin, N. U.; Wang, N.; Chukwueke, U.; White, M. D.; Nayyar, N.; Kim, A. Single-arm, open-label phase 2 trial of pembrolizumab in patients with leptomeningeal carcinomatosis. *Nature medicine* **2020**, *26* (8), 1280-1284.
- (45) Kim, C.; Liu, S. V.; Subramaniam, D. S.; Torres, T.; Loda, M.; Esposito, G.; Giaccone, G. Phase I study of the 177Lu-DOTA0-Tyr3-Octreotate (lutathera) in combination with nivolumab in patients with neuroendocrine tumors of the lung. *Journal for Immunotherapy of Cancer* **2020**, *8* (2).
- (46) Graff, J. N.; Beer, T. M.; Alumkal, J. J.; Slottke, R. E.; Redmond, W. L.; Thomas, G. V.; Thompson, R. F.; Wood, M. A.; Koguchi, Y.; Chen, Y. A phase II single-arm study of pembrolizumab with enzalutamide in men with metastatic castration-resistant prostate cancer progressing on enzalutamide alone. *Journal for immunotherapy of cancer* **2020**, *8* (2).
- (47) Ferrarotto, R.; Bell, D.; Rubin, M. L.; Hutcheson, K. A.; Johnson, J. M.; Goepfert, R. P.; Phan, J.; Elamin, Y. Y.; Torman, D. K.; Warneke, C. L. Impact of neoadjuvant durvalumab with or without tremelimumab on CD8+ tumor lymphocyte density, safety, and efficacy in patients with oropharynx cancer: CIAO trial results. *Clinical Cancer Research* **2020**, *26* (13), 3211-3219.



- (48) Postow, M. A.; Knox, S. J.; Goldman, D. A.; Elhanati, Y.; Mavinkurve, V.; Wong, P.; Halpenny, D.; Reddy, S. K.; Vado, K.; McCabe, D. A prospective, phase 1 trial of nivolumab, ipilimumab, and radiotherapy in patients with advanced melanoma. *Clinical Cancer Research* **2020**, *26* (13), 3193-3201.
- (49) Zamarin, D.; Walderich, S.; Holland, A.; Zhou, Q.; Iasonos, A. E.; Torrisi, J. M.; Merghoub, T.; Chesebrough, L. F.; McDonnell, A. S.; Gallagher, J. M. Safety, immunogenicity, and clinical efficacy of durvalumab in combination with folate receptor alpha vaccine TPIV200 in patients with advanced ovarian cancer: a phase II trial. *Journal for ImmunoTherapy of Cancer* **2020**, *8* (1).
- (50) Feng, K.; Liu, Y.; Zhao, Y.; Yang, Q.; Dong, L.; Liu, J.; Li, X.; Zhao, Z.; Mei, Q.; Han, W. Efficacy and biomarker analysis of nivolumab plus gemcitabine and cisplatin in patients with unresectable or metastatic biliary tract cancers: results from a phase II study. *Journal for immunotherapy of cancer* **2020**, *8* (1).
- (51) Kanda, S.; Ohe, Y.; Goto, Y.; Horinouchi, H.; Fujiwara, Y.; Nokihara, H.; Yamamoto, N.; Yamamoto, T.; Tamura, T. Five-year safety and efficacy data from a phase Ib study of nivolumab and chemotherapy in advanced non-small-cell lung cancer. *Cancer Science* **2020**, *111* (6), 1933-1942.
- (52) Arrieta, O.; Barrón, F.; Ramírez-Tirado, L. A.; Zatarain-Barrón, Z. L.; Cardona, A. F.; Díaz-García, D.; Ramos, M. Y.; Mota-Vega, B.; Carmona, A.; Álvarez, M. P. P. Efficacy and safety of pembrolizumab plus docetaxel vs docetaxel alone in patients with previously treated advanced non-small cell lung cancer: The PROLUNG phase 2 randomized clinical trial. *JAMA oncology* **2020**, *6* (6), 856-864.
- (53) Rozeman, E. A.; Prevo, W.; Meier, M. A.; Sikorska, K.; Van, T. M.; van de Wiel, B. A.; van Der Wal, J. E.; Mallo, H. A.; Grijpink-Ongering, L. G.; Broeks, A. Phase Ib/II trial testing combined radiofrequency ablation and ipilimumab in uveal melanoma (SECIRA-UM). *Melanoma Research* **2020**, *30* (3), 252-260.
- (54) Xie, C.; Duffy, A. G.; Brar, G.; Fioravanti, S.; Mabry-Hrones, D.; Walker, M.; Bonilla, C. M.; Wood, B. J.; Citrin, D. E.; Gil Ramirez, E. M. Immune checkpoint blockade in combination with stereotactic body radiotherapy in patients with metastatic pancreatic ductal adenocarcinoma. *Clinical Cancer Research* **2020**, *26* (10), 2318-2326.
- (55) Music, M.; Iafolla, M.; Soosaipillai, A.; Batruch, I.; Prassas, I.; Pintilie, M.; Hansen, A. R.; Bedard, P. L.; Lheureux, S.; Spreafico, A. Predicting response and toxicity to PD-1 inhibition using serum autoantibodies identified from immuno-mass spectrometry. *F1000Research* **2020**, *9*.
- (56) Liu, J.; Liu, Q.; Li, Y.; Li, Q.; Su, F.; Yao, H.; Su, S.; Wang, Q.; Jin, L.; Wang, Y. Efficacy and safety of camrelizumab combined with apatinib in advanced triple-negative breast cancer: an open-label phase II trial. *Journal for immunotherapy of cancer* **2020**, *8* (1).
- (57) Xie, L.; Xu, J.; Sun, X.; Guo, W.; Gu, J.; Liu, K.; Zheng, B.; Ren, T.; Huang, Y.; Tang, X. Apatinib plus camrelizumab (anti-PD1 therapy, SHR-1210) for advanced osteosarcoma (APFAO) progressing after chemotherapy: a single-arm, open-label, phase 2 trial. *Journal for immunotherapy of cancer* **2020**, *8* (1).
- (58) Goldberg, S. B.; Schalper, K. A.; Gettinger, S. N.; Mahajan, A.; Herbst, R. S.; Chiang, A. C.; Lilienbaum, R.; Wilson, F. H.; Omay, S. B.; James, B. Y. Pembrolizumab for management of patients with NSCLC and brain metastases: long-term results and biomarker analysis from a non-randomised, open-label, phase 2 trial. *The Lancet Oncology* **2020**, *21* (5), 655-663.
- (59) Gao, S.; Li, N.; Gao, S.; Xue, Q.; Ying, J.; Wang, S.; Tao, X.; Zhao, J.; Mao, Y.; Wang, B. Neoadjuvant PD-1 inhibitor (Sintilimab) in NSCLC. *Journal of Thoracic Oncology* **2020**, *15* (5), 816-826.
- (60) Kamath, S. D.; Kalyan, A.; Kircher, S.; Nimeiri, H.; Fought, A. J.; Benson III, A.; Mulcahy, M. Ipilimumab and gemcitabine for advanced pancreatic cancer: a phase Ib study. *The oncologist* **2020**, *25* (5), e808-e815.
- (61) Naing, A.; Meric-Bernstam, F.; Stephen, B.; Karp, D. D.; Hajjar, J.; Ahnert, J. R.; Piha-Paul, S. A.; Colen, R. R.; Jimenez, C.; Raghav, K. P. Phase 2 study of pembrolizumab in patients with advanced rare cancers. *Journal for immunotherapy of cancer* **2020**, *8* (1).
- (62) Kelly, C. M.; Antonescu, C. R.; Bowler, T.; Munhoz, R.; Chi, P.; Dickson, M. A.; Gounder, M. M.; Keohan, M. L.; Movva, S.; Dholakia, R. Objective response rate among patients with locally advanced or metastatic sarcoma treated with talimogene laherparepvec in combination with pembrolizumab: a phase 2 clinical trial. *JAMA oncology* **2020**, *6* (3), 402-408.
- (63) Ross, A. E.; Hurley, P. J.; Tran, P. T.; Rowe, S. P.; Benzon, B.; Neal, T. O.; Chapman, C.; Harb, R.; Milman, Y.; Trock, B. J. A pilot trial of pembrolizumab plus prostatic cryotherapy for men with newly diagnosed oligometastatic hormone-sensitive prostate cancer. *Prostate cancer and prostatic diseases* **2020**, *23* (1), 184-193.

- (64) Rodriguez, C. P.; Wu, Q.; Voutsinas, J.; Fromm, J. R.; Jiang, X.; Pillarisetty, V. G.; Lee, S. M.; Santana-Davila, R.; Goulart, B.; Baik, C. S. A phase II trial of pembrolizumab and vorinostat in recurrent metastatic head and neck squamous cell carcinomas and salivary gland cancer. *Clinical Cancer Research* **2020**, *26* (4), 837-845.
- (65) Shah, A. N.; Flaum, L.; Helenowski, I.; Santa-Maria, C. A.; Jain, S.; Rademaker, A.; Nelson, V.; Tsarwhas, D.; Cristofanilli, M.; Gradishar, W. Phase II study of pembrolizumab and capecitabine for triple negative and hormone receptor-positive, HER2– negative endocrine-refractory metastatic breast cancer. *Journal for immunotherapy of cancer* **2020**, *8* (1).
- (66) Yarchoan, M.; Huang, C. Y.; Zhu, Q.; Ferguson, A. K.; Durham, J. N.; Anders, R. A.; Thompson, E. D.; Rozich, N. S.; Thomas, D. L.; Nauroth, J. M. A phase 2 study of GVAX colon vaccine with cyclophosphamide and pembrolizumab in patients with mismatch repair proficient advanced colorectal cancer. *Cancer medicine* **2020**, *9* (4), 1485-1494.
- (67) Lin, S. H.; Lin, Y.; Yao, L.; Kalhor, N.; Carter, B. W.; Altan, M.; Blumenschein, G.; Byers, L. A.; Fossella, F.; Gibbons, D. L. Phase II trial of concurrent atezolizumab with chemoradiation for unresectable NSCLC. *Journal of Thoracic Oncology* **2020**, *15* (2), 248-257.
- (68) Welsh, J. W.; Heymach, J. V.; Chen, D.; Verma, V.; Cushman, T. R.; Hess, K. R.; Shroff, G.; Tang, C.; Skoulidis, F.; Jeter, M. Phase I trial of pembrolizumab and radiation therapy after induction chemotherapy for extensive-stage small cell lung cancer. *Journal of Thoracic Oncology* **2020**, *15* (2), 266-273.
- (69) Mahalingam, D.; Wilkinson, G. A.; Eng, K. H.; Fields, P.; Raber, P.; Moseley, J. L.; Cheetham, K.; Coffey, M.; Nuovo, G.; Kalinski, P. Pembrolizumab in combination with the oncolytic virus pelareorep and chemotherapy in patients with advanced pancreatic adenocarcinoma: a phase Ib study. *Clinical Cancer Research* **2020**, *26* (1), 71-81.
- (70) Elbers, J. B.; Al-Mamgani, A.; Tesseslaar, M. E.; van den Brekel, M. W.; Lange, C. A.; van der Wal, J. E.; Verheij, M.; Zuur, C. L.; de Boer, J. P. Immuno-radiotherapy with cetuximab and avelumab for advanced stage head and neck squamous cell carcinoma: Results from a phase-I trial. *Radiotherapy and Oncology* **2020**, *142*, 79-84.
- (71) Di Giacomo, A. M.; Covre, A.; Finotello, F.; Rieder, D.; Danielli, R.; Sigalotti, L.; Giannarelli, D.; Petitprez, F.; Lacroix, L.; Valente, M. Guadecitabine plus ipilimumab in unresectable melanoma: the NIBIT-M4 clinical trial. *Clinical Cancer Research* **2019**, *25* (24), 7351-7362.
- (72) Welsh, J. W.; Tang, C.; De Groot, P.; Naing, A.; Hess, K. R.; Heymach, J. V.; Papadimitrakopoulou, V. A.; Cushman, T. R.; Subbiah, V.; Chang, J. Y. Phase II trial of ipilimumab with stereotactic radiation therapy for metastatic disease: outcomes, toxicities, and low-dose radiation–related abscopal responses. *Cancer immunology research* **2019**, *7* (12), 1903-1909.
- (73) Gray, J. E.; Saltos, A.; Tanvetyanon, T.; Haura, E. B.; Creelan, B.; Antonia, S. J.; Shafique, M.; Zheng, H.; Dai, W.; Saller, J. J. Phase I/Ib study of pembrolizumab plus vorinostat in advanced/metastatic non–small cell lung cancer. *Clinical Cancer Research* **2019**, *25* (22), 6623-6632.
- (74) Qiao, G.; Wang, X.; Zhou, X.; Morse, M. A.; Wu, J.; Wang, S.; Song, Y.; Jiang, N.; Zhao, Y.; Zhou, L. Immune correlates of clinical benefit in a phase I study of hyperthermia with adoptive T cell immunotherapy in patients with solid tumors. *International Journal of Hyperthermia* **2019**, *36* (sup1), 74-82.
- (75) Chintakuntlawar, A. V.; Yin, J.; Foote, R. L.; Kasperbauer, J. L.; Rivera, M.; Asmus, E.; Garces, N. I.; Janus, J. R.; Liu, M.; Ma, D. J. A phase 2 study of pembrolizumab combined with chemoradiotherapy as initial treatment for anaplastic thyroid cancer. *Thyroid* **2019**, *29* (11), 1615-1622.
- (76) Feun, L. G.; Li, Y. Y.; Wu, C.; Wangpaichitr, M.; Jones, P. D.; Richman, S. P.; Madrazo, B.; Kwon, D.; Garcia-Buitrago, M.; Martin, P. Phase 2 study of pembrolizumab and circulating biomarkers to predict anticancer response in advanced, unresectable hepatocellular carcinoma. *Cancer* **2019**, *125* (20), 3603-3614.
- (77) Habra, M. A.; Stephen, B.; Campbell, M.; Hess, K.; Tapia, C.; Xu, M.; Rodon Ahnert, J.; Jimenez, C.; Lee, J. E.; Perrier, N. D. Phase II clinical trial of pembrolizumab efficacy and safety in advanced adrenocortical carcinoma. *Journal for immunotherapy of cancer* **2019**, *7*, 1-9.
- (78) Cho, J.; Kim, H. S.; Ku, B. M.; Choi, Y.-L.; Cristescu, R.; Han, J.; Sun, J.-M.; Lee, S.-H.; Ahn, J. S.; Park, K. Pembrolizumab for patients with refractory or relapsed thymic epithelial tumor: an open-label phase II trial. *J clin oncol* **2019**, *37* (24), 2162-2170.
- (79) Chalmers, A. W.; Patel, S.; Boucher, K.; Cannon, L.; Esplin, M.; Luckart, J.; Graves, N.; Van Duren, T.; Akerley, W. Phase I trial of targeted EGFR or ALK therapy with ipilimumab in metastatic NSCLC with long-term follow-up. *Targeted Oncology* **2019**, *14*, 417-421.

- (80) Mego, M.; Svetlovska, D.; Chovanec, M.; Rečková, M.; Rejlekova, K.; Obertova, J.; Palacka, P.; Sycova-Mila, Z.; De Giorgi, U.; Mardiak, J. Phase II study of avelumab in multiple relapsed/refractory germ cell cancer. *Investigational new drugs* **2019**, *37*, 748-754.
- (81) Thomas, A.; Vilimas, R.; Trindade, C.; Erwin-Cohen, R.; Roper, N.; Xi, L.; Krishnasamy, V.; Levy, E.; Mammen, A.; Nichols, S. Durvalumab in combination with olaparib in patients with relapsed SCLC: results from a phase II study. *Journal of Thoracic Oncology* **2019**, *14* (8), 1447-1457.
- (82) Zimmer, A. S.; Nichols, E.; Cimino-Mathews, A.; Peer, C.; Cao, L.; Lee, M.-J.; Kohn, E. C.; Annunziata, C. M.; Lipkowitz, S.; Trepel, J. B. A phase I study of the PD-L1 inhibitor, durvalumab, in combination with a PARP inhibitor, olaparib, and a VEGFR1–3 inhibitor, cediranib, in recurrent women's cancers with biomarker analyses. *Journal for immunotherapy of cancer* **2019**, *7* (1), 1-8.
- (83) Suresh, K.; Naidoo, J.; Zhong, Q.; Xiong, Y.; Mammen, J.; De Flores, M. V.; Cappelli, L.; Balaji, A.; Palmer, T.; Forde, P. M. The alveolar immune cell landscape is dysregulated in checkpoint inhibitor pneumonitis. *The Journal of clinical investigation* **2019**, *129* (10), 4305-4315.
- (84) Sundahl, N.; Seremet, T.; Van Dorpe, J.; Neyns, B.; Ferdinande, L.; Meireson, A.; Brochez, L.; Kruse, V.; Ost, P. Phase 2 trial of nivolumab combined with stereotactic body radiation therapy in patients with metastatic or locally advanced inoperable melanoma. *International Journal of Radiation Oncology\* Biology\* Physics* **2019**, *104* (4), 828-835.
- (85) Voorwerk, L.; Slagter, M.; Horlings, H. M.; Sikorska, K.; van de Vijver, K. K.; de Maaker, M.; Nederlof, I.; Kluin, R. J.; Warren, S.; Ong, S. Immune induction strategies in metastatic triple-negative breast cancer to enhance the sensitivity to PD-1 blockade: the TONIC trial. *Nature medicine* **2019**, *25* (6), 920-928.
- (86) Wilky, B. A.; Trucco, M. M.; Subhawong, T. K.; Florou, V.; Park, W.; Kwon, D.; Wieder, E. D.; Kolonias, D.; Rosenberg, A. E.; Kerr, D. A. Axitinib plus pembrolizumab in patients with advanced sarcomas including alveolar soft-part sarcoma: a single-centre, single-arm, phase 2 trial. *The lancet oncology* **2019**, *20* (6), 837-848.
- (87) Sundahl, N.; Vandekerckhove, G.; Decaestecker, K.; Meireson, A.; De Visschere, P.; Fonteyne, V.; De Maeseneer, D.; Reynders, D.; Goetghebeur, E.; Van Dorpe, J. Randomized phase 1 trial of pembrolizumab with sequential versus concomitant stereotactic body radiotherapy in metastatic urothelial carcinoma. *European urology* **2019**, *75* (5), 707-711.
- (88) Disselhorst, M. J.; Quispel-Janssen, J.; Lalezari, F.; Monkhorst, K.; de Vries, J. F.; van der Noort, V.; Harms, E.; Burgers, S.; Baas, P. Ipilimumab and nivolumab in the treatment of recurrent malignant pleural mesothelioma (INITIATE): results of a prospective, single-arm, phase 2 trial. *The Lancet Respiratory Medicine* **2019**, *7* (3), 260-270.
- (89) Huang, J.; Mo, H.; Zhang, W.; Chen, X.; Qu, D.; Wang, X.; Wu, D.; Wang, X.; Lan, B.; Yang, B. Promising efficacy of SHR-1210, a novel anti-programmed cell death 1 antibody, in patients with advanced gastric and gastroesophageal junction cancer in China. *Cancer* **2019**, *125* (5), 742-749.
- (90) Chung, V.; Kos, F.; Hardwick, N.; Yuan, Y.; Chao, J.; Li, D.; Waisman, J.; Li, M.; Zurcher, K.; Frankel, P. Evaluation of safety and efficacy of p53MVA vaccine combined with pembrolizumab in patients with advanced solid cancers. *Clinical and Translational Oncology* **2019**, *21*, 363-372.
- (91) Miyamoto, S.; Nomura, R.; Sato, K.; Awano, N.; Kuse, N.; Inomata, M.; Izumo, T.; Terada, Y.; Furuhashi, Y.; Bae, Y. Nivolumab and stereotactic radiation therapy for the treatment of patients with Stage IV non-small-cell lung cancer. *Japanese journal of clinical oncology* **2019**, *49* (2), 160-164.
- (92) Tang, B.; Yan, X.; Sheng, X.; Si, L.; Cui, C.; Kong, Y.; Mao, L.; Lian, B.; Bai, X.; Wang, X. Safety and clinical activity with an anti-PD-1 antibody JS001 in advanced melanoma or urologic cancer patients. *Journal of hematology & oncology* **2019**, *12*, 1-15.
- (93) Ali, O. H.; Berner, F.; Bomze, D.; Fässler, M.; Diem, S.; Cozzio, A.; Jörger, M.; Früh, M.; Driessen, C.; Lenz, T. L. Human leukocyte antigen variation is associated with adverse events of checkpoint inhibitors. *European Journal of Cancer* **2019**, *107*, 8-14.
- (94) Kluger, H. M.; Chiang, V.; Mahajan, A.; Zito, C. R.; Sznol, M.; Tran, T.; Weiss, S. A.; Cohen, J. V.; Yu, J.; Hegde, U. Long-term survival of patients with melanoma with active brain metastases treated with pembrolizumab on a phase II trial. *Journal of Clinical Oncology* **2019**, *37* (1), 52.
- (95) Massarelli, E.; William, W.; Johnson, F.; Kies, M.; Ferrarotto, R.; Guo, M.; Feng, L.; Lee, J. J.; Tran, H.; Kim, Y. U. Combining immune checkpoint blockade and tumor-specific vaccine for patients with incurable human papillomavirus 16-related cancer: a phase 2 clinical trial. *JAMA oncology* **2019**, *5* (1), 67-73.

- (96) Parikh, M.; Pan, C.-X.; Beckett, L. A.; Li, Y.; Robles, D. A.; Aujla, P. K.; Lara Jr, P. N. Pembrolizumab combined with either docetaxel or gemcitabine in patients with advanced or metastatic platinum-refractory urothelial cancer: results from a phase I study. *Clinical genitourinary cancer* **2018**, *16* (6), 421-428. e421.
- (1) Lam, T.; Tsang, K.; Choi, H.; Lee, V.; Lam, K.; Chiang, C.; So, T.; Chan, W.; Nyaw, S.; Lim, F. Combination atezolizumab, bevacizumab, pemetrexed and carboplatin for metastatic EGFR mutated NSCLC after TKI failure. *Lung Cancer* **2021**, *159*, 18-26.
- (2) Edenfield, W. J.; Chung, K.; O'Rourke, M.; Cull, E.; Martin, J.; Bowers, H.; Smith, W.; Gluck, W. L. A phase II study of durvalumab in combination with tremelimumab in patients with rare cancers. *The Oncologist* **2021**, *26* (9), e1499-e1507.
- (3) Ferrarotto, R.; Sousa, L. G.; Qing, Y.; Kaya, D.; Stephen, B.; Jain, D.; Bell, D.; Pant, S.; Tsimberidou, A. M.; Janku, F. Pembrolizumab in patients with refractory cutaneous squamous cell carcinoma: a phase II trial. *Advances in Therapy* **2021**, *38* (8), 4581-4591.
- (4) Zhu, X.; Cao, Y.; Liu, W. Stereotactic body radiotherapy plus pembrolizumab and trametinib versus stereotactic body radiotherapy plus gemcitabine for locally recurrent pancreatic cancer after surgical resection: an open-label, randomised, controlled, phase 2 trial (Retraction of Vol 22, Pg 1093, 2021). ELSEVIER SCIENCE INC STE 800, 230 PARK AVE, NEW YORK, NY 10169 USA: 2022.
- (5) Reschke, R.; Gussek, P.; Boldt, A.; Sack, U.; Köhl, U.; Lordick, F.; Gora, T.; Kreuz, M.; Reiche, K.; Simon, J.-C. Distinct immune signatures indicative of treatment response and immune-related adverse events in melanoma patients under immune checkpoint inhibitor therapy. *International journal of molecular sciences* **2021**, *22* (15), 8017.
- (6) Chang, K.-Y.; Chiang, N.-J.; Wu, S.-Y.; Yen, C.-J.; Chen, S.-H.; Yeh, Y.-M.; Li, C.-F.; Feng, X.; Wu, K.; Johnston, A. Phase 1b study of pegylated arginine deiminase (ADI-PEG 20) plus Pembrolizumab in advanced solid cancers. *Oncoimmunology* **2021**, *10* (1), 1943253.
- (7) Zhang, W.; Yan, C.; Gao, X.; Li, X.; Cao, F.; Zhao, G.; Zhao, J.; Er, P.; Zhang, T.; Chen, X. Safety and feasibility of radiotherapy plus camrelizumab for locally advanced esophageal squamous cell carcinoma. *The oncologist* **2021**, *26* (7), e1110-e1124.
- (8) Tsimberidou, A.-M.; Vo, H. H.; Subbiah, V.; Janku, F.; Piha-Paul, S.; Yilmaz, B.; Gong, J.; Naqvi, M. F.; Tu, S.-M.; Campbell, M. Pembrolizumab in patients with advanced metastatic germ cell tumors. *The Oncologist* **2021**, *26* (7), 558-e1098.
- (9) Marcq, G.; Souhami, L.; Cury, F. L.; Salimi, A.; Aprikian, A.; Tanguay, S.; Vanhuyse, M.; Rajan, R.; Brimo, F.; Mansure, J. J. Phase 1 trial of atezolizumab plus trimodal therapy in patients with localized muscle-invasive bladder cancer. *International Journal of Radiation Oncology\* Biology\* Physics* **2021**, *110* (3), 738-741.
- (10) Altorki, N. K.; McGraw, T. E.; Borczuk, A. C.; Saxena, A.; Port, J. L.; Stiles, B. M.; Lee, B. E.; Sanfilippo, N. J.; Scheff, R. J.; Pua, B. B. Neoadjuvant durvalumab with or without stereotactic body radiotherapy in patients with early-stage non-small-cell lung cancer: a single-centre, randomised phase 2 trial. *The Lancet Oncology* **2021**, *22* (6), 824-835.
- (11) Aamdal, E.; Inderberg, E. M.; Ellingsen, E. B.; Rasch, W.; Brunsvig, P. F.; Aamdal, S.; Heintz, K.-M.; Vodák, D.; Nakken, S.; Hovig, E. Combining a universal telomerase based cancer vaccine with ipilimumab in patients with metastatic melanoma-five-year follow up of a phase I/IIa trial. *Frontiers in Immunology* **2021**, *12*, 663865.
- (12) Di Noia, V.; D'Argento, E.; Pilotto, S.; Vita, E.; Ferrara, M. G.; Damiano, P.; Ribelli, M.; Cannella, A.; Virtuoso, A.; Fattorossi, A. Blood serum amyloid A as potential biomarker of pembrolizumab efficacy for patients affected by advanced non-small cell lung cancer overexpressing PD-L1: results of the exploratory "FoRECATT" study. *Cancer Immunology, Immunotherapy* **2021**, *70*, 1583-1592.
- (13) Shenderov, E.; Boudadi, K.; Fu, W.; Wang, H.; Sullivan, R.; Jordan, A.; Dowling, D.; Harb, R.; Schonhoft, J.; Jendrisak, A. Nivolumab plus ipilimumab, with or without enzalutamide, in AR-V7-expressing metastatic castration-resistant prostate cancer: A phase-2 nonrandomized clinical trial. *The Prostate* **2021**, *81* (6), 326-338.
- (14) Sahebjam, S.; Forsyth, P. A.; Tran, N. D.; Arrington, J. A.; Macaulay, R.; Etame, A. B.; Walko, C. M.; Boyle, T.; Peguero, E. N.; Jaglal, M. Hypofractionated stereotactic re-irradiation with pembrolizumab and bevacizumab in patients with recurrent high-grade gliomas: results from a phase I study. *Neuro-oncology* **2021**, *23* (4), 677-686.
- (15) Chu, T.; Zhong, R.; Zhong, H.; Zhang, B.; Zhang, W.; Shi, C.; Qian, J.; Zhang, Y.; Chang, Q.; Zhang, X. Phase 1b study of sintilimab plus anlotinib as first-line therapy in patients with advanced NSCLC. *Journal of Thoracic Oncology* **2021**, *16* (4), 643-652.

- (16) Ma, Y.; Fang, W.; Zhao, H.; Bathena, S. P.; Tendolkar, A.; Sheng, J.; Zhang, L. A Phase I Dose Escalation Study of the Safety, Tolerability, and Pharmacokinetics of Ipilimumab in Chinese Patients with Select Advanced Solid Tumors. *The Oncologist* **2021**, *26* (4), e549-e566.
- (17) Cascone, T.; William Jr, W. N.; Weissferdt, A.; Leung, C. H.; Lin, H. Y.; Pataer, A.; Godoy, M. C.; Carter, B. W.; Federico, L.; Reuben, A. Neoadjuvant nivolumab or nivolumab plus ipilimumab in operable non-small cell lung cancer: the phase 2 randomized NEOSTAR trial. *Nature medicine* **2021**, *27* (3), 504-514.
- (18) Eichhorn, F.; Klotz, L. V.; Kriegsmann, M.; Bischoff, H.; Schneider, M. A.; Muley, T.; Kriegsmann, K.; Haberkorn, U.; Heussel, C. P.; Savai, R. Neoadjuvant anti-programmed death-1 immunotherapy by pembrolizumab in resectable non-small cell lung cancer: First clinical experience. *Lung Cancer* **2021**, *153*, 150-157.
- (19) Pelster, M. S.; Gruschkus, S. K.; Bassett, R.; Gombos, D. S.; Shephard, M.; Posada, L.; Glover, M. S.; Simien, R.; Diab, A.; Hwu, P. Nivolumab and ipilimumab in metastatic uveal melanoma: results from a single-arm phase II study. *Journal of Clinical Oncology* **2021**, *39* (6), 599.
- (20) Sarfaty, M.; Whiting, K.; Teo, M. Y.; Lee, C. H.; Peters, V.; Durocher, J.; Regazzi, A. M.; McCoy, A. S.; Hettich, G.; Jungbluth, A. A. A phase II trial of durvalumab and tremelimumab in metastatic, non-urothelial carcinoma of the urinary tract. *Cancer Medicine* **2021**, *10* (3), 1074-1083.
- (21) Yuan, Y.; Lee, J. S.; Yost, S. E.; Frankel, P. H.; Ruel, C.; Egelston, C. A.; Guo, W.; Gillece, J. D.; Folkerts, M.; Reining, L. A phase II clinical trial of pembrolizumab and enobosarm in patients with androgen receptor-positive metastatic triple-negative breast cancer. *The Oncologist* **2021**, *26* (2), 99-e217.
- (22) Perez, B. A.; Kim, S.; Wang, M.; Karimi, A. M.; Powell, C.; Li, J.; Dilling, T. J.; Chiappori, A.; Latifi, K.; Rose, T. Prospective single-arm phase 1 and 2 study: ipilimumab and nivolumab with thoracic radiation therapy after platinum chemotherapy in extensive-stage small cell lung cancer. *International Journal of Radiation Oncology\* Biology\* Physics* **2021**, *109* (2), 425-435.
- (23) Maity, A.; Mick, R.; Rengan, R.; Mitchell, T. C.; Amaravadi, R. K.; Schuchter, L. M.; Pryma, D. A.; Patsch, D. M.; Maity, A. P.; Minn, A. J. A stratified phase I dose escalation trial of hypofractionated radiotherapy followed by ipilimumab in metastatic melanoma: long-term follow-up and final outcomes. *Oncoimmunology* **2021**, *10* (1), 1863631.
- (24) Kitano, S.; Shimizu, T.; Koyama, T.; Ebata, T.; Iwasa, S.; Kondo, S.; Shimomura, A.; Fujiwara, Y.; Yamamoto, N.; Paccaly, A. Dose exploration results from Phase 1 study of cemiplimab, a human monoclonal programmed death (PD)-1 antibody, in Japanese patients with advanced malignancies. *Cancer Chemotherapy and Pharmacology* **2021**, *87*, 53-64.
- (25) Mahmood, U.; Bang, A.; Chen, Y.-H.; Mak, R. H.; Lorch, J. H.; Hanna, G. J.; Nishino, M.; Manuszak, C.; Thrash, E. M.; Severgnini, M. A randomized phase 2 study of pembrolizumab with or without radiation in patients with recurrent or metastatic adenoid cystic carcinoma. *International Journal of Radiation Oncology\* Biology\* Physics* **2021**, *109* (1), 134-144.
- (26) Pakkala, S.; Higgins, K.; Chen, Z.; Sica, G.; Steuer, C.; Zhang, C.; Zhang, G.; Wang, S.; Hossain, M. S.; Nazha, B. Durvalumab and tremelimumab with or without stereotactic body radiation therapy in relapsed small cell lung cancer: a randomized phase II study. *Journal for Immunotherapy of Cancer* **2020**, *8* (2).
- (27) Majd, N.; Waguespack, S. G.; Janku, F.; Fu, S.; Penas-Prado, M.; Xu, M.; Alshawa, A.; Kamiya-Matsuoka, C.; Raza, S. M.; McCutcheon, I. E. Efficacy of pembrolizumab in patients with pituitary carcinoma: report of four cases from a phase II study. *Journal for Immunotherapy of Cancer* **2020**, *8* (2).
- (28) van Dijk, N.; Gil-Jimenez, A.; Silina, K.; Hendricksen, K.; Smit, L. A.; de Feijter, J. M.; van Montfoort, M. L.; van Rooijen, C.; Peters, D.; Broeks, A. Preoperative ipilimumab plus nivolumab in locoregionally advanced urothelial cancer: the NABUCCO trial. *Nature medicine* **2020**, *26* (12), 1839-1844.
- (29) Gao, J.; Navai, N.; Alhalabi, O.; Siefker-Radtke, A.; Campbell, M. T.; Tidwell, R. S.; Guo, C. C.; Kamat, A. M.; Matin, S. F.; Araujo, J. C. Neoadjuvant PD-L1 plus CTLA-4 blockade in patients with cisplatin-ineligible operable high-risk urothelial carcinoma. *Nature medicine* **2020**, *26* (12), 1845-1851.
- (30) Welsh, J. W.; Heymach, J. V.; Guo, C.; Menon, H.; Klein, K.; Cushman, T. R.; Verma, V.; Hess, K. R.; Shroff, G.; Tang, C. Phase 1/2 trial of pembrolizumab and concurrent chemoradiation therapy for limited-stage SCLC. *Journal of Thoracic Oncology* **2020**, *15* (12), 1919-1927.
- (31) Duska, L. R.; Scalici, J. M.; Temkin, S. M.; Schwarz, J. K.; Crane, E. K.; Moxley, K. M.; Hamilton, C. A.; Wethington, S. L.; Petroni, G. R.; Varhegyi, N. E. Results of an early safety analysis of a study of the combination of pembrolizumab and pelvic chemoradiation in locally advanced cervical cancer. *Cancer* **2020**, *126* (22), 4948-4956.

- (32) Schweizer, C.; Schubert, P.; Rutzner, S.; Eckstein, M.; Haderlein, M.; Lettmaier, S.; Semrau, S.; Gostian, A.-O.; Frey, B.; Gaipl, U. S. Prospective evaluation of the prognostic value of immune-related adverse events in patients with non-melanoma solid tumour treated with PD-1/PD-L1 inhibitors alone and in combination with radiotherapy. *European Journal of Cancer* **2020**, *140*, 55-62.
- (33) Takahashi, A.; Namikawa, K.; Ogata, D.; Nakano, E.; Jinnai, S.; Nakama, K.; Tsutsui, K.; Muto, Y.; Mizuta, H.; Yamazaki, N. Real-world efficacy and safety data of nivolumab and ipilimumab combination therapy in Japanese patients with advanced melanoma. *The Journal of Dermatology* **2020**, *47* (11), 1267-1275.
- (34) Awada, G.; Salama, L. B.; De Cremer, J.; Schwarze, J. K.; Fischbuch, L.; Seynaeve, L.; Du Four, S.; Vanbinst, A.-M.; Michotte, A.; Everaert, H. Axitinib plus avelumab in the treatment of recurrent glioblastoma: a stratified, open-label, single-center phase 2 clinical trial (GliAvAx). *Journal for immunotherapy of cancer* **2020**, *8* (2).
- (35) Welsh, J.; Menon, H.; Chen, D.; Verma, V.; Tang, C.; Altan, M.; Hess, K.; De Groot, P.; Nguyen, Q.-N.; Varghese, R. Pembrolizumab with or without radiation therapy for metastatic non-small cell lung cancer: a randomized phase I/II trial. *Journal for immunotherapy of cancer* **2020**, *8* (2).
- (36) Wang, Z.; Ying, J.; Xu, J.; Yuan, P.; Duan, J.; Bai, H.; Guo, C.; Li, L.; Yang, Z.; Wan, R. Safety, Antitumor Activity, and Pharmacokinetics of Toripalimab, a Programmed Cell Death 1 Inhibitor, in Patients With Advanced Non–Small Cell Lung Cancer: A Phase 1 Trial. *JAMA network open* **2020**, *3* (10), e2013770-e2013770.
- (37) Schoenfeld, J. D.; Hanna, G. J.; Jo, V. Y.; Rawal, B.; Chen, Y.-H.; Catalano, P. S.; Lako, A.; Ciantra, Z.; Weirather, J. L.; Criscitiello, S. Neoadjuvant nivolumab or nivolumab plus ipilimumab in untreated oral cavity squamous cell carcinoma: a phase 2 open-label randomized clinical trial. *JAMA oncology* **2020**, *6* (10), 1563-1570.
- (38) O'Neill, C.; Hayat, T.; Hamm, J.; Healey, M.; Zheng, Q.; Li, Y.; Martin II, R. C. A phase 1b trial of concurrent immunotherapy and irreversible electroporation in the treatment of locally advanced pancreatic adenocarcinoma. *Surgery* **2020**, *168* (4), 610-616.
- (39) Frumovitz, M.; Westin, S. N.; Salvo, G.; Zarifa, A.; Xu, M.; Yap, T. A.; Rodon, A. J.; Karp, D. D.; Abonofal, A.; Jazaeri, A. A. Phase II study of pembrolizumab efficacy and safety in women with recurrent small cell neuroendocrine carcinoma of the lower genital tract. *Gynecologic oncology* **2020**, *158* (3), 570-575.
- (40) Ratnayake, G.; Reinwald, S.; Shackleton, M.; Moore, M.; Voskoboynik, M.; Ruben, J.; van Zelm, M. C.; Yu, D.; Ward, R.; Smith, R. Stereotactic radiation therapy combined with immunotherapy against metastatic melanoma: long-term results of a phase 1 clinical trial. *International Journal of Radiation Oncology\* Biology\* Physics* **2020**, *108* (1), 150-156.
- (41) Boutros, C.; Chaput-Gras, N.; Lanoy, E.; Larive, A.; Mateus, C.; Routier, E.; Sun, R.; Tao, Y. G.; Massard, C.; Bahleda, R. Dose escalation phase 1 study of radiotherapy in combination with anti-cytotoxic-T-lymphocyte-associated antigen 4 monoclonal antibody ipilimumab in patients with metastatic melanoma. *Journal for Immunotherapy of Cancer* **2020**, *8* (2).
- (42) Kawazoe, A.; Fukuoka, S.; Nakamura, Y.; Kuboki, Y.; Wakabayashi, M.; Nomura, S.; Mikamoto, Y.; Shima, H.; Fujishiro, N.; Higuchi, T. Lenvatinib plus pembrolizumab in patients with advanced gastric cancer in the first-line or second-line setting (EPOC1706): an open-label, single-arm, phase 2 trial. *The Lancet Oncology* **2020**, *21* (8), 1057-1065.
- (43) Wei, X. L.; Ren, C.; Wang, F. H.; Zhang, Y.; Zhao, H. Y.; Zou, B. Y.; Wang, Z. Q.; Qiu, M. Z.; Zhang, D. S.; Luo, H. Y. A phase I study of toripalimab, an anti-PD-1 antibody, in patients with refractory malignant solid tumors. *Cancer Communications* **2020**, *40* (8), 345-354.
- (44) Brastianos, P. K.; Lee, E. Q.; Cohen, J. V.; Tolaney, S. M.; Lin, N. U.; Wang, N.; Chukwueke, U.; White, M. D.; Nayyar, N.; Kim, A. Single-arm, open-label phase 2 trial of pembrolizumab in patients with leptomeningeal carcinomatosis. *Nature medicine* **2020**, *26* (8), 1280-1284.
- (45) Kim, C.; Liu, S. V.; Subramaniam, D. S.; Torres, T.; Loda, M.; Esposito, G.; Giaccone, G. Phase I study of the 177Lu-DOTA0-Tyr3-Octreotate (lutathera) in combination with nivolumab in patients with neuroendocrine tumors of the lung. *Journal for Immunotherapy of Cancer* **2020**, *8* (2).
- (46) Graff, J. N.; Beer, T. M.; Alumkal, J. J.; Slottke, R. E.; Redmond, W. L.; Thomas, G. V.; Thompson, R. F.; Wood, M. A.; Koguchi, Y.; Chen, Y. A phase II single-arm study of pembrolizumab with enzalutamide in men with metastatic castration-resistant prostate cancer progressing on enzalutamide alone. *Journal for immunotherapy of cancer* **2020**, *8* (2).
- (47) Ferrarotto, R.; Bell, D.; Rubin, M. L.; Hutcheson, K. A.; Johnson, J. M.; Goepfert, R. P.; Phan, J.; Elamin, Y. Y.; Torman, D. K.; Warneke, C. L. Impact of neoadjuvant durvalumab with or without tremelimumab on CD8+ tumor lymphocyte density, safety, and efficacy in patients with oropharynx cancer: CIAO trial results. *Clinical Cancer Research* **2020**, *26* (13), 3211-3219.

- (48) Postow, M. A.; Knox, S. J.; Goldman, D. A.; Elhanati, Y.; Mavinkurve, V.; Wong, P.; Halpenny, D.; Reddy, S. K.; Vado, K.; McCabe, D. A prospective, phase 1 trial of nivolumab, ipilimumab, and radiotherapy in patients with advanced melanoma. *Clinical Cancer Research* **2020**, *26* (13), 3193-3201.
- (49) Zamarin, D.; Walderich, S.; Holland, A.; Zhou, Q.; Iasonos, A. E.; Torrisi, J. M.; Merghoub, T.; Chesebrough, L. F.; McDonnell, A. S.; Gallagher, J. M. Safety, immunogenicity, and clinical efficacy of durvalumab in combination with folate receptor alpha vaccine TPIV200 in patients with advanced ovarian cancer: a phase II trial. *Journal for ImmunoTherapy of Cancer* **2020**, *8* (1).
- (50) Feng, K.; Liu, Y.; Zhao, Y.; Yang, Q.; Dong, L.; Liu, J.; Li, X.; Zhao, Z.; Mei, Q.; Han, W. Efficacy and biomarker analysis of nivolumab plus gemcitabine and cisplatin in patients with unresectable or metastatic biliary tract cancers: results from a phase II study. *Journal for immunotherapy of cancer* **2020**, *8* (1).
- (51) Kanda, S.; Ohe, Y.; Goto, Y.; Horinouchi, H.; Fujiwara, Y.; Nokihara, H.; Yamamoto, N.; Yamamoto, T.; Tamura, T. Five-year safety and efficacy data from a phase Ib study of nivolumab and chemotherapy in advanced non-small-cell lung cancer. *Cancer Science* **2020**, *111* (6), 1933-1942.
- (52) Arrieta, O.; Barrón, F.; Ramírez-Tirado, L. A.; Zatarain-Barrón, Z. L.; Cardona, A. F.; Díaz-García, D.; Ramos, M. Y.; Mota-Vega, B.; Carmona, A.; Álvarez, M. P. P. Efficacy and safety of pembrolizumab plus docetaxel vs docetaxel alone in patients with previously treated advanced non-small cell lung cancer: The PROLUNG phase 2 randomized clinical trial. *JAMA oncology* **2020**, *6* (6), 856-864.
- (53) Rozeman, E. A.; Prevo, W.; Meier, M. A.; Sikorska, K.; Van, T. M.; van de Wiel, B. A.; van Der Wal, J. E.; Mallo, H. A.; Grijpink-Ongering, L. G.; Broeks, A. Phase Ib/II trial testing combined radiofrequency ablation and ipilimumab in uveal melanoma (SECIRA-UM). *Melanoma Research* **2020**, *30* (3), 252-260.
- (54) Xie, C.; Duffy, A. G.; Brar, G.; Fioravanti, S.; Mabry-Hrones, D.; Walker, M.; Bonilla, C. M.; Wood, B. J.; Citrin, D. E.; Gil Ramirez, E. M. Immune checkpoint blockade in combination with stereotactic body radiotherapy in patients with metastatic pancreatic ductal adenocarcinoma. *Clinical Cancer Research* **2020**, *26* (10), 2318-2326.
- (55) Music, M.; Iafolla, M.; Soosaipillai, A.; Batruch, I.; Prassas, I.; Pintilie, M.; Hansen, A. R.; Bedard, P. L.; Lheureux, S.; Spreafico, A. Predicting response and toxicity to PD-1 inhibition using serum autoantibodies identified from immuno-mass spectrometry. *F1000Research* **2020**, *9*.
- (56) Liu, J.; Liu, Q.; Li, Y.; Li, Q.; Su, F.; Yao, H.; Su, S.; Wang, Q.; Jin, L.; Wang, Y. Efficacy and safety of camrelizumab combined with apatinib in advanced triple-negative breast cancer: an open-label phase II trial. *Journal for immunotherapy of cancer* **2020**, *8* (1).
- (57) Xie, L.; Xu, J.; Sun, X.; Guo, W.; Gu, J.; Liu, K.; Zheng, B.; Ren, T.; Huang, Y.; Tang, X. Apatinib plus camrelizumab (anti-PD1 therapy, SHR-1210) for advanced osteosarcoma (APFAO) progressing after chemotherapy: a single-arm, open-label, phase 2 trial. *Journal for immunotherapy of cancer* **2020**, *8* (1).
- (58) Goldberg, S. B.; Schalper, K. A.; Gettinger, S. N.; Mahajan, A.; Herbst, R. S.; Chiang, A. C.; Lilenbaum, R.; Wilson, F. H.; Omay, S. B.; James, B. Y. Pembrolizumab for management of patients with NSCLC and brain metastases: long-term results and biomarker analysis from a non-randomised, open-label, phase 2 trial. *The Lancet Oncology* **2020**, *21* (5), 655-663.
- (59) Gao, S.; Li, N.; Gao, S.; Xue, Q.; Ying, J.; Wang, S.; Tao, X.; Zhao, J.; Mao, Y.; Wang, B. Neoadjuvant PD-1 inhibitor (Sintilimab) in NSCLC. *Journal of Thoracic Oncology* **2020**, *15* (5), 816-826.
- (60) Kamath, S. D.; Kalyan, A.; Kircher, S.; Nimeiri, H.; Fought, A. J.; Benson III, A.; Mulcahy, M. Ipilimumab and gemcitabine for advanced pancreatic cancer: a phase Ib study. *The oncologist* **2020**, *25* (5), e808-e815.
- (61) Naing, A.; Meric-Bernstam, F.; Stephen, B.; Karp, D. D.; Hajjar, J.; Ahnert, J. R.; Piha-Paul, S. A.; Colen, R. R.; Jimenez, C.; Raghav, K. P. Phase 2 study of pembrolizumab in patients with advanced rare cancers. *Journal for immunotherapy of cancer* **2020**, *8* (1).
- (62) Kelly, C. M.; Antonescu, C. R.; Bowler, T.; Munhoz, R.; Chi, P.; Dickson, M. A.; Gounder, M. M.; Keohan, M. L.; Movva, S.; Dholakia, R. Objective response rate among patients with locally advanced or metastatic sarcoma treated with talimogene laherparepvec in combination with pembrolizumab: a phase 2 clinical trial. *JAMA oncology* **2020**, *6* (3), 402-408.
- (63) Ross, A. E.; Hurley, P. J.; Tran, P. T.; Rowe, S. P.; Benzon, B.; Neal, T. O.; Chapman, C.; Harb, R.; Milman, Y.; Trock, B. J. A pilot trial of pembrolizumab plus prostatic cryotherapy for men with newly diagnosed oligometastatic hormone-sensitive prostate cancer. *Prostate cancer and prostatic diseases* **2020**, *23* (1), 184-193.

- (64) Rodriguez, C. P.; Wu, Q.; Voutsinas, J.; Fromm, J. R.; Jiang, X.; Pillarisetty, V. G.; Lee, S. M.; Santana-Davila, R.; Goulart, B.; Baik, C. S. A phase II trial of pembrolizumab and vorinostat in recurrent metastatic head and neck squamous cell carcinomas and salivary gland cancer. *Clinical Cancer Research* **2020**, *26* (4), 837-845.
- (65) Shah, A. N.; Flaum, L.; Helenowski, I.; Santa-Maria, C. A.; Jain, S.; Rademaker, A.; Nelson, V.; Tsarwhas, D.; Cristofanilli, M.; Gradishar, W. Phase II study of pembrolizumab and capecitabine for triple negative and hormone receptor-positive, HER2– negative endocrine-refractory metastatic breast cancer. *Journal for immunotherapy of cancer* **2020**, *8* (1).
- (66) Yarchoan, M.; Huang, C. Y.; Zhu, Q.; Ferguson, A. K.; Durham, J. N.; Anders, R. A.; Thompson, E. D.; Rozich, N. S.; Thomas, D. L.; Nauroth, J. M. A phase 2 study of GVAX colon vaccine with cyclophosphamide and pembrolizumab in patients with mismatch repair proficient advanced colorectal cancer. *Cancer medicine* **2020**, *9* (4), 1485-1494.
- (67) Lin, S. H.; Lin, Y.; Yao, L.; Kalhor, N.; Carter, B. W.; Altan, M.; Blumenschein, G.; Byers, L. A.; Fossella, F.; Gibbons, D. L. Phase II trial of concurrent atezolizumab with chemoradiation for unresectable NSCLC. *Journal of Thoracic Oncology* **2020**, *15* (2), 248-257.
- (68) Welsh, J. W.; Heymach, J. V.; Chen, D.; Verma, V.; Cushman, T. R.; Hess, K. R.; Shroff, G.; Tang, C.; Skoulidis, F.; Jeter, M. Phase I trial of pembrolizumab and radiation therapy after induction chemotherapy for extensive-stage small cell lung cancer. *Journal of Thoracic Oncology* **2020**, *15* (2), 266-273.
- (69) Mahalingam, D.; Wilkinson, G. A.; Eng, K. H.; Fields, P.; Raber, P.; Moseley, J. L.; Cheetham, K.; Coffey, M.; Nuovo, G.; Kalinski, P. Pembrolizumab in combination with the oncolytic virus pelareorep and chemotherapy in patients with advanced pancreatic adenocarcinoma: a phase Ib study. *Clinical Cancer Research* **2020**, *26* (1), 71-81.
- (70) Elbers, J. B.; Al-Mamgani, A.; Tesseslaar, M. E.; van den Brekel, M. W.; Lange, C. A.; van der Wal, J. E.; Verheij, M.; Zuur, C. L.; de Boer, J. P. Immuno-radiotherapy with cetuximab and avelumab for advanced stage head and neck squamous cell carcinoma: Results from a phase-I trial. *Radiotherapy and Oncology* **2020**, *142*, 79-84.
- (71) Di Giacomo, A. M.; Covre, A.; Finotello, F.; Rieder, D.; Danielli, R.; Sigalotti, L.; Giannarelli, D.; Petitprez, F.; Lacroix, L.; Valente, M. Guadecitabine plus ipilimumab in unresectable melanoma: the NIBIT-M4 clinical trial. *Clinical Cancer Research* **2019**, *25* (24), 7351-7362.
- (72) Welsh, J. W.; Tang, C.; De Groot, P.; Naing, A.; Hess, K. R.; Heymach, J. V.; Papadimitrakopoulou, V. A.; Cushman, T. R.; Subbiah, V.; Chang, J. Y. Phase II trial of ipilimumab with stereotactic radiation therapy for metastatic disease: outcomes, toxicities, and low-dose radiation–related abscopal responses. *Cancer immunology research* **2019**, *7* (12), 1903-1909.
- (73) Gray, J. E.; Saltos, A.; Tanvetyanon, T.; Haura, E. B.; Creelan, B.; Antonia, S. J.; Shafique, M.; Zheng, H.; Dai, W.; Saller, J. J. Phase I/Ib study of pembrolizumab plus vorinostat in advanced/metastatic non–small cell lung cancer. *Clinical Cancer Research* **2019**, *25* (22), 6623-6632.
- (74) Qiao, G.; Wang, X.; Zhou, X.; Morse, M. A.; Wu, J.; Wang, S.; Song, Y.; Jiang, N.; Zhao, Y.; Zhou, L. Immune correlates of clinical benefit in a phase I study of hyperthermia with adoptive T cell immunotherapy in patients with solid tumors. *International Journal of Hyperthermia* **2019**, *36* (sup1), 74-82.
- (75) Chintakuntlawar, A. V.; Yin, J.; Foote, R. L.; Kasperbauer, J. L.; Rivera, M.; Asmus, E.; Garces, N. I.; Janus, J. R.; Liu, M.; Ma, D. J. A phase 2 study of pembrolizumab combined with chemoradiotherapy as initial treatment for anaplastic thyroid cancer. *Thyroid* **2019**, *29* (11), 1615-1622.
- (76) Feun, L. G.; Li, Y. Y.; Wu, C.; Wangpaichitr, M.; Jones, P. D.; Richman, S. P.; Madrazo, B.; Kwon, D.; Garcia-Buitrago, M.; Martin, P. Phase 2 study of pembrolizumab and circulating biomarkers to predict anticancer response in advanced, unresectable hepatocellular carcinoma. *Cancer* **2019**, *125* (20), 3603-3614.
- (77) Habra, M. A.; Stephen, B.; Campbell, M.; Hess, K.; Tapia, C.; Xu, M.; Rodon Ahnert, J.; Jimenez, C.; Lee, J. E.; Perrier, N. D. Phase II clinical trial of pembrolizumab efficacy and safety in advanced adrenocortical carcinoma. *Journal for immunotherapy of cancer* **2019**, *7*, 1-9.
- (78) Cho, J.; Kim, H. S.; Ku, B. M.; Choi, Y.-L.; Cristescu, R.; Han, J.; Sun, J.-M.; Lee, S.-H.; Ahn, J. S.; Park, K. Pembrolizumab for patients with refractory or relapsed thymic epithelial tumor: an open-label phase II trial. *J clin oncol* **2019**, *37* (24), 2162-2170.
- (79) Chalmers, A. W.; Patel, S.; Boucher, K.; Cannon, L.; Esplin, M.; Luckart, J.; Graves, N.; Van Duren, T.; Akerley, W. Phase I trial of targeted EGFR or ALK therapy with ipilimumab in metastatic NSCLC with long-term follow-up. *Targeted Oncology* **2019**, *14*, 417-421.



- (80) Mego, M.; Svetlovska, D.; Chovanec, M.; Rečková, M.; Rejlekova, K.; Obertova, J.; Palacka, P.; Sycova-Mila, Z.; De Giorgi, U.; Mardiak, J. Phase II study of avelumab in multiple relapsed/refractory germ cell cancer. *Investigational new drugs* **2019**, *37*, 748-754.
- (81) Thomas, A.; Vilimas, R.; Trindade, C.; Erwin-Cohen, R.; Roper, N.; Xi, L.; Krishnasamy, V.; Levy, E.; Mammen, A.; Nichols, S. Durvalumab in combination with olaparib in patients with relapsed SCLC: results from a phase II study. *Journal of Thoracic Oncology* **2019**, *14* (8), 1447-1457.
- (82) Zimmer, A. S.; Nichols, E.; Cimino-Mathews, A.; Peer, C.; Cao, L.; Lee, M.-J.; Kohn, E. C.; Annunziata, C. M.; Lipkowitz, S.; Trepel, J. B. A phase I study of the PD-L1 inhibitor, durvalumab, in combination with a PARP inhibitor, olaparib, and a VEGFR1–3 inhibitor, cediranib, in recurrent women's cancers with biomarker analyses. *Journal for immunotherapy of cancer* **2019**, *7* (1), 1-8.
- (83) Suresh, K.; Naidoo, J.; Zhong, Q.; Xiong, Y.; Mammen, J.; De Flores, M. V.; Cappelli, L.; Balaji, A.; Palmer, T.; Forde, P. M. The alveolar immune cell landscape is dysregulated in checkpoint inhibitor pneumonitis. *The Journal of clinical investigation* **2019**, *129* (10), 4305-4315.
- (84) Sundahl, N.; Seremet, T.; Van Dorpe, J.; Neyns, B.; Ferdinande, L.; Meireson, A.; Brochez, L.; Kruse, V.; Ost, P. Phase 2 trial of nivolumab combined with stereotactic body radiation therapy in patients with metastatic or locally advanced inoperable melanoma. *International Journal of Radiation Oncology\* Biology\* Physics* **2019**, *104* (4), 828-835.
- (85) Voorwerk, L.; Slagter, M.; Horlings, H. M.; Sikorska, K.; van de Vijver, K. K.; de Maaker, M.; Nederlof, I.; Kluin, R. J.; Warren, S.; Ong, S. Immune induction strategies in metastatic triple-negative breast cancer to enhance the sensitivity to PD-1 blockade: the TONIC trial. *Nature medicine* **2019**, *25* (6), 920-928.
- (86) Wilky, B. A.; Trucco, M. M.; Subhawong, T. K.; Florou, V.; Park, W.; Kwon, D.; Wieder, E. D.; Kolonias, D.; Rosenberg, A. E.; Kerr, D. A. Axitinib plus pembrolizumab in patients with advanced sarcomas including alveolar soft-part sarcoma: a single-centre, single-arm, phase 2 trial. *The lancet oncology* **2019**, *20* (6), 837-848.
- (87) Sundahl, N.; Vandekerckhove, G.; Decaestecker, K.; Meireson, A.; De Visschere, P.; Fonteyne, V.; De Maeseneer, D.; Reynders, D.; Goetghebeur, E.; Van Dorpe, J. Randomized phase 1 trial of pembrolizumab with sequential versus concomitant stereotactic body radiotherapy in metastatic urothelial carcinoma. *European urology* **2019**, *75* (5), 707-711.
- (88) Disselhorst, M. J.; Quispel-Janssen, J.; Lalezari, F.; Monkhorst, K.; de Vries, J. F.; van der Noort, V.; Harms, E.; Burgers, S.; Baas, P. Ipilimumab and nivolumab in the treatment of recurrent malignant pleural mesothelioma (INITIATE): results of a prospective, single-arm, phase 2 trial. *The Lancet Respiratory Medicine* **2019**, *7* (3), 260-270.
- (89) Huang, J.; Mo, H.; Zhang, W.; Chen, X.; Qu, D.; Wang, X.; Wu, D.; Wang, X.; Lan, B.; Yang, B. Promising efficacy of SHR-1210, a novel anti-programmed cell death 1 antibody, in patients with advanced gastric and gastroesophageal junction cancer in China. *Cancer* **2019**, *125* (5), 742-749.
- (90) Chung, V.; Kos, F.; Hardwick, N.; Yuan, Y.; Chao, J.; Li, D.; Waisman, J.; Li, M.; Zurcher, K.; Frankel, P. Evaluation of safety and efficacy of p53MVA vaccine combined with pembrolizumab in patients with advanced solid cancers. *Clinical and Translational Oncology* **2019**, *21*, 363-372.
- (91) Miyamoto, S.; Nomura, R.; Sato, K.; Awano, N.; Kuse, N.; Inomata, M.; Izumo, T.; Terada, Y.; Furuhashi, Y.; Bae, Y. Nivolumab and stereotactic radiation therapy for the treatment of patients with Stage IV non-small-cell lung cancer. *Japanese journal of clinical oncology* **2019**, *49* (2), 160-164.
- (92) Tang, B.; Yan, X.; Sheng, X.; Si, L.; Cui, C.; Kong, Y.; Mao, L.; Lian, B.; Bai, X.; Wang, X. Safety and clinical activity with an anti-PD-1 antibody JS001 in advanced melanoma or urologic cancer patients. *Journal of hematology & oncology* **2019**, *12*, 1-15.
- (93) Ali, O. H.; Berner, F.; Bomze, D.; Fässler, M.; Diem, S.; Cozzio, A.; Jörger, M.; Früh, M.; Driessen, C.; Lenz, T. L. Human leukocyte antigen variation is associated with adverse events of checkpoint inhibitors. *European Journal of Cancer* **2019**, *107*, 8-14.
- (94) Kluger, H. M.; Chiang, V.; Mahajan, A.; Zito, C. R.; Sznol, M.; Tran, T.; Weiss, S. A.; Cohen, J. V.; Yu, J.; Hegde, U. Long-term survival of patients with melanoma with active brain metastases treated with pembrolizumab on a phase II trial. *Journal of Clinical Oncology* **2019**, *37* (1), 52.
- (95) Massarelli, E.; William, W.; Johnson, F.; Kies, M.; Ferrarotto, R.; Guo, M.; Feng, L.; Lee, J. J.; Tran, H.; Kim, Y. U. Combining immune checkpoint blockade and tumor-specific vaccine for patients with incurable human papillomavirus 16-related cancer: a phase 2 clinical trial. *JAMA oncology* **2019**, *5* (1), 67-73.

- (96) Parikh, M.; Pan, C.-X.; Beckett, L. A.; Li, Y.; Robles, D. A.; Aujla, P. K.; Lara Jr, P. N. Pembrolizumab combined with either docetaxel or gemcitabine in patients with advanced or metastatic platinum-refractory urothelial cancer: results from a phase I study. *Clinical genitourinary cancer* **2018**, *16* (6), 421-428. e421.
- (97) Maity, A.; Mick, R.; Huang, A. C.; George, S. M.; Farwell, M. D.; Lukens, J. N.; Berman, A. T.; Mitchell, T. C.; Bauml, J.; Schuchter, L. M. A phase I trial of pembrolizumab with hypofractionated radiotherapy in patients with metastatic solid tumours. *British journal of cancer* **2018**, *119* (10), 1200-1207.
- (98) Amaria, R. N.; Reddy, S. M.; Tawbi, H. A.; Davies, M. A.; Ross, M. I.; Glitza, I. C.; Cormier, J. N.; Lewis, C.; Hwu, W.-J.; Hanna, E. Neoadjuvant immune checkpoint blockade in high-risk resectable melanoma. *Nature medicine* **2018**, *24* (11), 1649-1654.
- (99) Tobin, R. P.; Jordan, K. R.; Robinson, W. A.; Davis, D.; Borges, V. F.; Gonzalez, R.; Lewis, K. D.; McCarter, M. D. Targeting myeloid-derived suppressor cells using all-trans retinoic acid in melanoma patients treated with Ipilimumab. *International immunopharmacology* **2018**, *63*, 282-291.
- (100) Tree, A. C.; Jones, K.; Hafeez, S.; Sharabiani, M. T. A.; Harrington, K. J.; Lalondrelle, S.; Ahmed, M.; Huddart, R. A. Dose-limiting urinary toxicity with pembrolizumab combined with weekly hypofractionated radiation therapy in bladder cancer. *International Journal of Radiation Oncology\* Biology\* Physics* **2018**, *101* (5), 1168-1171.
- (101) Lisberg, A.; Cummings, A.; Goldman, J. W.; Bornazyan, K.; Reese, N.; Wang, T.; Coluzzi, P.; Ledezma, B.; Mendenhall, M.; Hunt, J. A phase II study of pembrolizumab in EGFR-mutant, PD-L1+, tyrosine kinase inhibitor naïve patients with advanced NSCLC. *Journal of Thoracic Oncology* **2018**, *13* (8), 1138-1145.
- (102) Calabrò, L.; Morra, A.; Giannarelli, D.; Amato, G.; D'Incecco, A.; Covre, A.; Lewis, A.; Rebelatto, M. C.; Danielli, R.; Altomonte, M. Tremelimumab combined with durvalumab in patients with mesothelioma (NIBIT-MESO-1): an open-label, non-randomised, phase 2 study. *The Lancet Respiratory Medicine* **2018**, *6* (6), 451-460.
- (103) Luke, J. J.; Lemons, J. M.; Karrison, T. G.; Pitroda, S. P.; Melotek, J. M.; Zha, Y.; Al-Hallaq, H. A.; Arina, A.; Khodarev, N. N.; Janisch, L. Safety and clinical activity of pembrolizumab and multisite stereotactic body radiotherapy in patients with advanced solid tumors. *Journal of Clinical Oncology* **2018**, *36* (16), 1611.
- (104) Strauss, J.; Heery, C. R.; Schlom, J.; Madan, R. A.; Cao, L.; Kang, Z.; Lamping, E.; Marté, J. L.; Donahue, R. N.; Grenga, I. Phase I trial of M7824 (MSB0011359C), a bifunctional fusion protein targeting PD-L1 and TGF $\beta$ , in advanced solid tumors. *Clinical Cancer Research* **2018**, *24* (6), 1287-1295.
- (105) Da Gama Duarte, J.; Parakh, S.; Andrews, M. C.; Woods, K.; Pasam, A.; Tutuka, C.; Ostrouska, S.; Blackburn, J. M.; Behren, A.; Cebon, J. Autoantibodies may predict immune-related toxicity: results from a Phase I study of intralesional Bacillus Calmette–Guérin followed by ipilimumab in patients with advanced metastatic melanoma. *Frontiers in immunology* **2018**, *9*, 411.
- (106) Giaccone, G.; Kim, C.; Thompson, J.; McGuire, C.; Kallakury, B.; Chahine, J. J.; Manning, M.; Mogg, R.; Blumenschein, W. M.; Tan, M. T. Pembrolizumab in patients with thymic carcinoma: a single-arm, single-centre, phase 2 study. *The Lancet Oncology* **2018**, *19* (3), 347-355.
- (107) Yang, C.-F. J.; McSherry, F.; Mayne, N. R.; Wang, X.; Berry, M. F.; Tong, B.; Harpole Jr, D. H.; D'Amico, T. A.; Christensen, J. D.; Ready, N. E. Surgical outcomes after neoadjuvant chemotherapy and ipilimumab for non-small cell lung cancer. *The Annals of Thoracic Surgery* **2018**, *105* (3), 924-929.
- (108) Sakamuri, D.; Glitza, I. C.; Betancourt Cuellar, S. L.; Subbiah, V.; Fu, S.; Tsimberidou, A. M.; Wheler, J. J.; Hong, D. S.; Naing, A.; Falchook, G. S. Phase I dose-escalation study of anti–CTLA-4 antibody ipilimumab and lenalidomide in patients with advanced cancers. *Molecular cancer therapeutics* **2018**, *17* (3), 671-676.
- (109) Ariyan, C. E.; Brady, M. S.; Siegelbaum, R. H.; Hu, J.; Bello, D. M.; Rand, J.; Fisher, C.; Lefkowitz, R. A.; Panageas, K. S.; Pulitzer, M. Robust antitumor responses result from local chemotherapy and CTLA-4 blockade. *Cancer immunology research* **2018**, *6* (2), 189-200.
- (110) Haag, G.; Zoernig, I.; Hassel, J.; Halama, N.; Dick, J.; Lang, N.; Podola, L.; Funk, J.; Ziegelmeier, C.; Juenger, S. Phase II trial of ipilimumab in melanoma patients with preexisting humoral immune response to NY-ESO-1. *European Journal of Cancer* **2018**, *90*, 122-129.
- (111) Weiss, G. J.; Blaydorn, L.; Beck, J.; Bornemann-Kolatzki, K.; Urnovitz, H.; Schütz, E.; Khemka, V. Phase Ib/II study of gemcitabine, nab-paclitaxel, and pembrolizumab in metastatic pancreatic adenocarcinoma. *Investigational new drugs* **2018**, *36*, 96-102.

- (112) Shoushtari, A. N.; Friedman, C. F.; Navid-Azarbaijani, P.; Postow, M. A.; Callahan, M. K.; Momtaz, P.; Panageas, K. S.; Wolchok, J. D.; Chapman, P. B. Measuring toxic effects and time to treatment failure for nivolumab plus ipilimumab in melanoma. *JAMA oncology* **2018**, *4* (1), 98-101.
- (113) Patel, S. P.; Kim, D. W.; Bassett, R. L.; Cain, S.; Washington, E.; Hwu, W.-J.; Kim, K. B.; Papadopoulos, N. E.; Homsy, J.; Hwu, P. A phase II study of ipilimumab plus temozolomide in patients with metastatic melanoma. *Cancer Immunology, Immunotherapy* **2017**, *66*, 1359-1366.
- (114) Ben-Ami, E.; Barysaukas, C. M.; Solomon, S.; Tahlil, K.; Malley, R.; Hohos, M.; Polson, K.; Loucks, M.; Severgnini, M.; Patel, T. Immunotherapy with single agent nivolumab for advanced leiomyosarcoma of the uterus: results of a phase 2 study. *Cancer* **2017**, *123* (17), 3285-3290.
- (115) Qin, A.; Street, L.; Cease, K.; Viglianti, B. L.; Warren, E. H.; Zhao, L.; Ramnath, N. Clinical determinants of durable clinical benefit of pembrolizumab in veterans with advanced non–small-cell lung cancer. *Clinical lung cancer* **2017**, *18* (5), 559-564.
- (116) Weiss, G. J.; Waypa, J.; Blaydorn, L.; Coats, J.; McGahey, K.; Sangal, A.; Niu, J.; Lynch, C. A.; Farley, J. H.; Khemka, V. A phase Ib study of pembrolizumab plus chemotherapy in patients with advanced cancer (PembroPlus). *British journal of cancer* **2017**, *117* (1), 33-40.
- (117) D'Angelo, S. P.; Shoushtari, A. N.; Keohan, M. L.; Dickson, M. A.; Gounder, M. M.; Chi, P.; Loo, J. K.; Gaffney, L.; Schneider, L.; Patel, Z. Combined KIT and CTLA-4 blockade in patients with refractory GIST and other advanced sarcomas: a phase Ib study of dasatinib plus ipilimumab. *Clinical Cancer Research* **2017**, *23* (12), 2972-2980.
- (118) Reilley, M. J.; Bailey, A.; Subbiah, V.; Janku, F.; Naing, A.; Falchook, G.; Karp, D.; Piha-Paul, S.; Tsimberidou, A.; Fu, S. Phase I clinical trial of combination imatinib and ipilimumab in patients with advanced malignancies. *Journal for immunotherapy of cancer* **2017**, *5*, 1-10.
- (119) Weide, B.; Martens, A.; Wistuba-Hamprecht, K.; Zelba, H.; Maier, L.; Lipp, H.-P.; Klumpp, B. D.; Soffel, D.; Eigentler, T. K.; Garbe, C. Combined treatment with ipilimumab and intratumoral interleukin-2 in pretreated patients with stage IV melanoma—safety and efficacy in a phase II study. *Cancer Immunology, Immunotherapy* **2017**, *66*, 441-449.
- (120) Yamamoto, N.; Nokihara, H.; Yamada, Y.; Shibata, T.; Tamura, Y.; Seki, Y.; Honda, K.; Tanabe, Y.; Wakui, H.; Tamura, T. Phase I study of Nivolumab, an anti-PD-1 antibody, in patients with malignant solid tumors. *Investigational new drugs* **2017**, *35*, 207-216.
- (121) Brustugun, O.; Sprauten, M.; Helland, Å. Real-world data on nivolumab treatment of non-small cell lung cancer. *Acta Oncologica* **2017**, *56* (3), 438-440.
- (122) Duffy, A. G.; Ulahannan, S. V.; Makorova-Rusher, O.; Rahma, O.; Wedemeyer, H.; Pratt, D.; Davis, J. L.; Hughes, M. S.; Heller, T.; ElGindi, M. Tremelimumab in combination with ablation in patients with advanced hepatocellular carcinoma. *Journal of hepatology* **2017**, *66* (3), 545-551.
- (123) Kanda, S.; Goto, K.; Shiraishi, H.; Kubo, E.; Tanaka, A.; Utsumi, H.; Sunami, K.; Kitazono, S.; Mizugaki, H.; Horinouchi, H. Safety and efficacy of nivolumab and standard chemotherapy drug combination in patients with advanced non-small-cell lung cancer: a four arms phase Ib study. *Annals of Oncology* **2016**, *27* (12), 2242-2250.
- (124) Ray, A.; Williams, M. A.; Meek, S. M.; Bowen, R. C.; Grossmann, K. F.; Andtbacka, R. H.; Bowles, T. L.; Hyngstrom, J. R.; Leachman, S. A.; Grossman, D. A phase I study of intratumoral ipilimumab and interleukin-2 in patients with advanced melanoma. *Oncotarget* **2016**, *7* (39), 64390.
- (125) Graff, J. N.; Alumkal, J. J.; Drake, C. G.; Thomas, G. V.; Redmond, W. L.; Farhad, M.; Cetnar, J. P.; Ey, F. S.; Bergan, R. C.; Slottke, R. Early evidence of anti-PD-1 activity in enzalutamide-resistant prostate cancer. *Oncotarget* **2016**, *7* (33), 52810.
- (126) Bjoern, J.; Iversen, T. Z.; Nitschke, N. J.; Andersen, M. H.; Svane, I. M. Safety, immune and clinical responses in metastatic melanoma patients vaccinated with a long peptide derived from indoleamine 2, 3-dioxygenase in combination with ipilimumab. *Cytotherapy* **2016**, *18* (8), 1043-1055.
- (127) Goldberg, S. B.; Gettinger, S. N.; Mahajan, A.; Chiang, A. C.; Herbst, R. S.; Sznol, M.; Tsiouris, A. J.; Cohen, J.; Vortmeyer, A.; Jilaveanu, L. Pembrolizumab for patients with melanoma or non-small-cell lung cancer and untreated brain metastases: early analysis of a non-randomised, open-label, phase 2 trial. *The lancet oncology* **2016**, *17* (7), 976-983.
- (128) Wilgenhof, S.; Corthals, J.; Heirman, C.; van Baren, N.; Lucas, S.; Kvistborg, P.; Thielemans, K.; Neyns, B. Phase II study of autologous monocyte-derived mRNA electroporated dendritic cells (TriMixDC-MEL) plus ipilimumab in patients with pretreated advanced melanoma. *J clin oncol* **2016**, *34* (12), 1330-1338.

- (129) Weber, J.; Gibney, G.; Kudchadkar, R.; Yu, B.; Cheng, P.; Martinez, A. J.; Kroeger, J.; Richards, A.; McCormick, L.; Moberg, V. Phase I/II study of metastatic melanoma patients treated with nivolumab who had progressed after ipilimumab. *Cancer immunology research* **2016**, *4* (4), 345-353.
- (130) Merchant, M. S.; Wright, M.; Baird, K.; Wexler, L. H.; Rodriguez-Galindo, C.; Bernstein, D.; Delbrook, C.; Lodish, M.; Bishop, R.; Wolchok, J. D. Phase I clinical trial of ipilimumab in pediatric patients with advanced solid tumors. *Clinical Cancer Research* **2016**, *22* (6), 1364-1370.
- (131) Freeman-Keller, M.; Kim, Y.; Cronin, H.; Richards, A.; Gibney, G.; Weber, J. S. Nivolumab in resected and unresectable metastatic melanoma: characteristics of immune-related adverse events and association with outcomes. *Clinical Cancer Research* **2016**, *22* (4), 886-894.
- (132) Hamanishi, J.; Mandai, M.; Ikeda, T.; Minami, M.; Kawaguchi, A.; Murayama, T.; Kanai, M.; Mori, Y.; Matsumoto, S.; Chikuma, S. Safety and antitumor activity of anti-PD-1 antibody, nivolumab, in patients with platinum-resistant ovarian cancer. *Journal of Clinical Oncology* **2015**, *33* (34), 4015-4022.
- (133) Horinouchi, H.; Yamamoto, N.; Fujiwara, Y.; Sekine, I.; Nokihara, H.; Kubota, K.; Kanda, S.; Yagishita, S.; Wakui, H.; Kitazono, S. Phase I study of ipilimumab in phased combination with paclitaxel and carboplatin in Japanese patients with non-small-cell lung cancer. *Investigational new drugs* **2015**, *33*, 881-889.
- (134) Calabrò, L.; Morra, A.; Fonsatti, E.; Cutaia, O.; Fazio, C.; Annesi, D.; Lenoci, M.; Amato, G.; Danielli, R.; Altomonte, M. Efficacy and safety of an intensified schedule of tremelimumab for chemotherapy-resistant malignant mesothelioma: an open-label, single-arm, phase 2 study. *The Lancet Respiratory Medicine* **2015**, *3* (4), 301-309.
- (135) Hodi, F.; Lawrence, D.; Lezcano, C.; Wu, X.; Zhou, J.; Sasada, T.; Zeng, W.; Giobbie-Hurder, A.; Atkins, M.; Ibrahim, N. *Bevacizumab plus ipilimumab in patients with metastatic melanoma. Cancer Immunol. Res.* **2014**; *2*: 632–642. doi: 10.1158/2326-6066; CIR-14-0053.[Europe PMC free article][Abstract][CrossRef][Google Scholar].
- (136) Weber, J. S.; Kudchadkar, R. R.; Yu, B.; Gallenstein, D.; Horak, C. E.; Inzunza, H. D.; Zhao, X.; Martinez, A. J.; Wang, W.; Gibney, G. Safety, efficacy, and biomarkers of nivolumab with vaccine in ipilimumab-refractory or-naïve melanoma. *Journal of clinical oncology* **2013**, *31* (34), 4311.
- (137) Calabrò, L.; Morra, A.; Fonsatti, E.; Cutaia, O.; Amato, G.; Giannarelli, D.; Di Giacomo, A. M.; Danielli, R.; Altomonte, M.; Mutti, L. Tremelimumab for patients with chemotherapy-resistant advanced malignant mesothelioma: an open-label, single-arm, phase 2 trial. *The Lancet Oncology* **2013**, *14* (11), 1104-1111.
- (138) Le, D. T.; Lutz, E.; Uram, J. N.; Sugar, E. A.; Onners, B.; Solt, S.; Zheng, L.; Diaz Jr, L. A.; Donehower, R. C.; Jaffee, E. M. Evaluation of ipilimumab in combination with allogeneic pancreatic tumor cells transfected with a GM-CSF gene in previously treated pancreatic cancer. *Journal of immunotherapy (Hagerstown, Md.: 1997)* **2013**, *36* (7), 382.
- (139) McNeel, D. G.; Smith, H. A.; Eickhoff, J. C.; Lang, J. M.; Staab, M. J.; Wilding, G.; Liu, G. Phase I trial of tremelimumab in combination with short-term androgen deprivation in patients with PSA-recurrent prostate cancer. *Cancer Immunology, Immunotherapy* **2012**, *61*, 1137-1147.
- (140) Madan, R. A.; Mohebtash, M.; Arlen, P. M.; Vergati, M.; Rauckhorst, M.; Steinberg, S. M.; Tsang, K. Y.; Poole, D. J.; Parnes, H. L.; Wright, J. J. Ipilimumab and a poxviral vaccine targeting prostate-specific antigen in metastatic castration-resistant prostate cancer: a phase 1 dose-escalation trial. *The lancet oncology* **2012**, *13* (5), 501-508.
- (141) Di Giacomo, A. M.; Danielli, R.; Calabrò, L.; Bertocci, E.; Nannicini, C.; Giannarelli, D.; Balestrazzi, A.; Vigni, F.; Riversi, V.; Miracco, C. Ipilimumab experience in heavily pretreated patients with melanoma in an expanded access program at the University Hospital of Siena (Italy). *Cancer immunology, immunotherapy* **2011**, *60*, 467-477.
- (142) Royal, R. E.; Levy, C.; Turner, K.; Mathur, A.; Hughes, M.; Kammula, U. S.; Sherry, R. M.; Topalian, S. L.; Yang, J. C.; Lowy, I. Phase 2 trial of single agent Ipilimumab (anti-CTLA-4) for locally advanced or metastatic pancreatic adenocarcinoma. *Journal of immunotherapy (Hagerstown, Md.: 1997)* **2010**, *33* (8), 828.
- (143) Ralph, C.; Elkord, E.; Burt, D. J.; O'Dwyer, J. F.; Austin, E. B.; Stern, P. L.; Hawkins, R. E.; Thistlethwaite, F. C. Modulation of lymphocyte regulation for cancer therapy: a phase II trial of tremelimumab in advanced gastric and esophageal adenocarcinoma. *Clinical Cancer Research* **2010**, *16* (5), 1662-1672.
- (144) Yang, J. C.; Hughes, M.; Kammula, U.; Royal, R.; Sherry, R. M.; Topalian, S. L.; Suri, K. B.; Levy, C.; Allen, T.; Mavroukakis, S. Ipilimumab (anti-CTLA4 antibody) causes regression of metastatic renal cell cancer associated with enteritis and hypophysitis. *Journal of immunotherapy (Hagerstown, Md.: 1997)* **2007**, *30* (8), 825.

- (145) Maker, A. V.; Yang, J. C.; Sherry, R. M.; Topalian, S. L.; Kammula, U. S.; Royal, R. E.; Hughes, M.; Yellin, M. J.; Haworth, L. R.; Levy, C. Inpatient dose escalation of anti-CTLA-4 antibody in patients with metastatic melanoma. *Journal of immunotherapy (Hagerstown, Md.: 1997)* **2006**, 29 (4), 455.
- (146) Reuben, J. M.; Lee, B. N.; Li, C.; Gomez-Navarro, J.; Bozon, V. A.; Parker, C. A.; Hernandez, I. M.; Gutierrez, C.; Lopez-Berestein, G.; Camacho, L. H. Biologic and immunomodulatory events after CTLA-4 blockade with ticilimumab in patients with advanced malignant melanoma. *Cancer* **2006**, 106 (11), 2437-2444.
- (147) Maker, A. V.; Phan, G. Q.; Attia, P.; Yang, J. C.; Sherry, R. M.; Topalian, S. L.; Kammula, U. S.; Royal, R. E.; Haworth, L. R.; Levy, C. Tumor regression and autoimmunity in patients treated with cytotoxic T lymphocyte-associated antigen 4 blockade and interleukin 2: a phase I/II study. *Annals of surgical oncology* **2005**, 12, 1005-1016.
