# Supplementary material for: Impact of Center Volume on Cardiopulmonary and Mortality Outcomes after Immune-Checkpoint Inhibitors for Cancer: A Systematic Review and Meta-Analysis
Source: MDPI journal article supplement (doi:10.3390/cancers16061136), 2024-03-13

## Supplementary material

### Supplementary figures legend

**Supplementary Figure S1:** PRISMA flowchart

**Supplementary Figure S2:** Bubble plots showing meta-regression of different variables on pooled events rates: A) study period on irAE grade 5, B) percentage of patients who underwent chemotherapy on cardiac related irAE, percentage of patients who underwent surgery on C) cardiac-related irAE and D) pulmonary-related irAE

**Supplementary Figure S3:** Funnel plots for assessment of publication bias; A for pulmonary irAEs, B for cardiac irAEs, C for grade 3,4 irAEs, D for any grade irAEs, and E for grade 5 irAEs

**Supplementary Figure S4:** Threshold analysis showing relation between number of annual cases and grade 3-4 (A), cardiac-related (B), and pulmonary-related (C) adverse events without 33 studies

Supplementary Figure S1: PRISMA flowchart

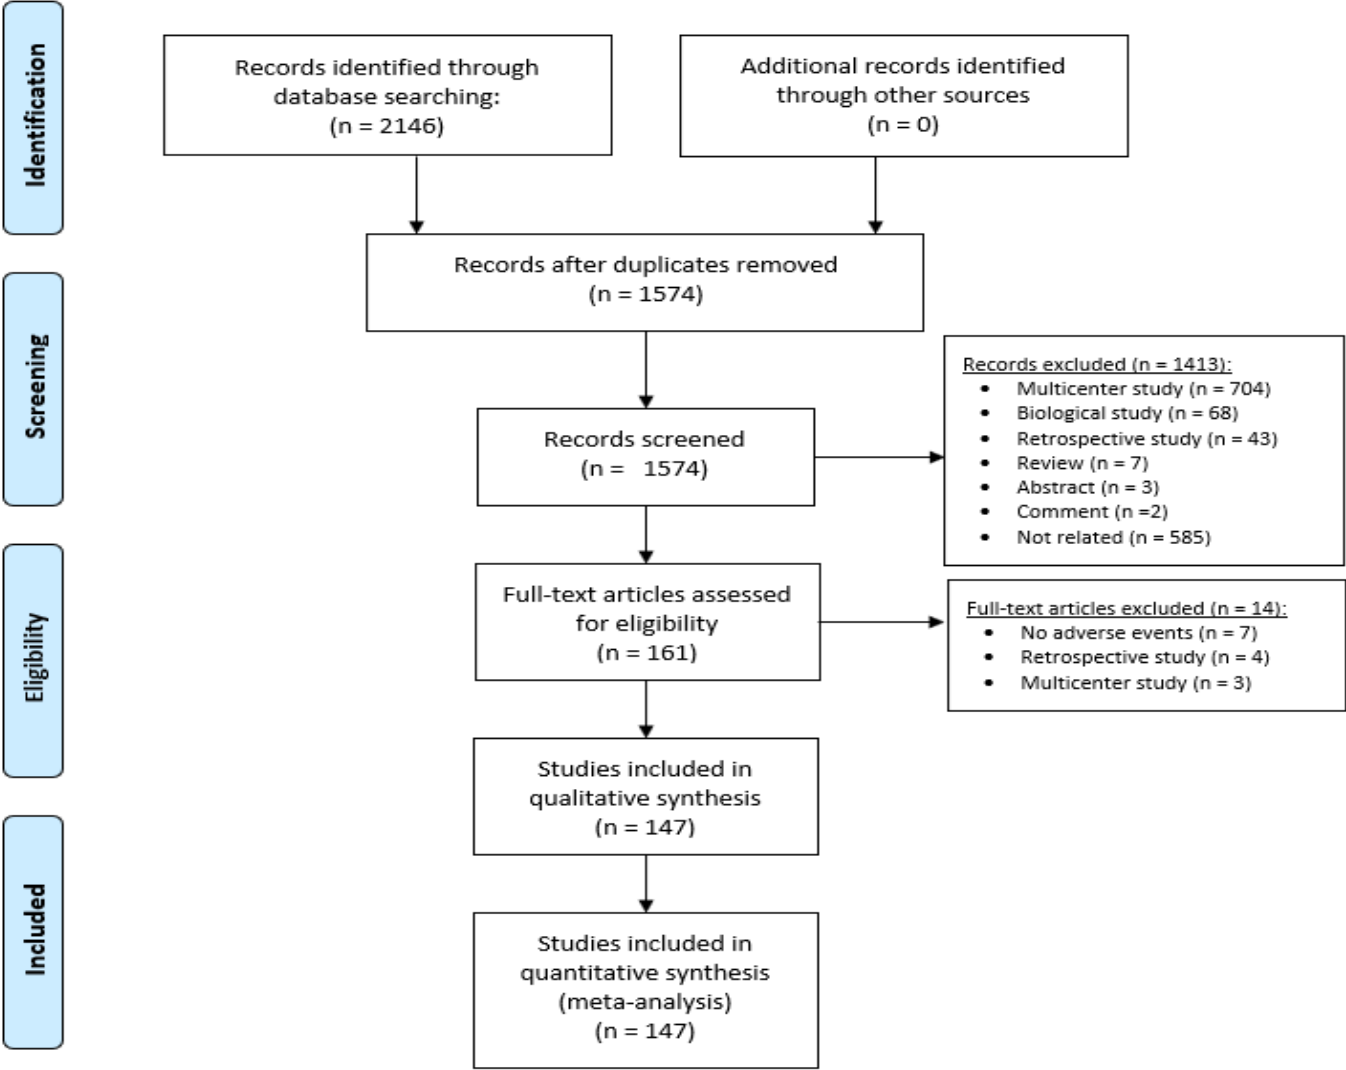

**Supplementary Figure S2:** Bubble plots showing meta-regression of different variables on pooled events rates: A) study period on irAEs grade 5, B) percentage of patients who underwent chemotherapy on cardiac-related irAEs, percentage of patients who underwent surgery on C) cardiac-related irAEs and D) pulmonary-related irAEs

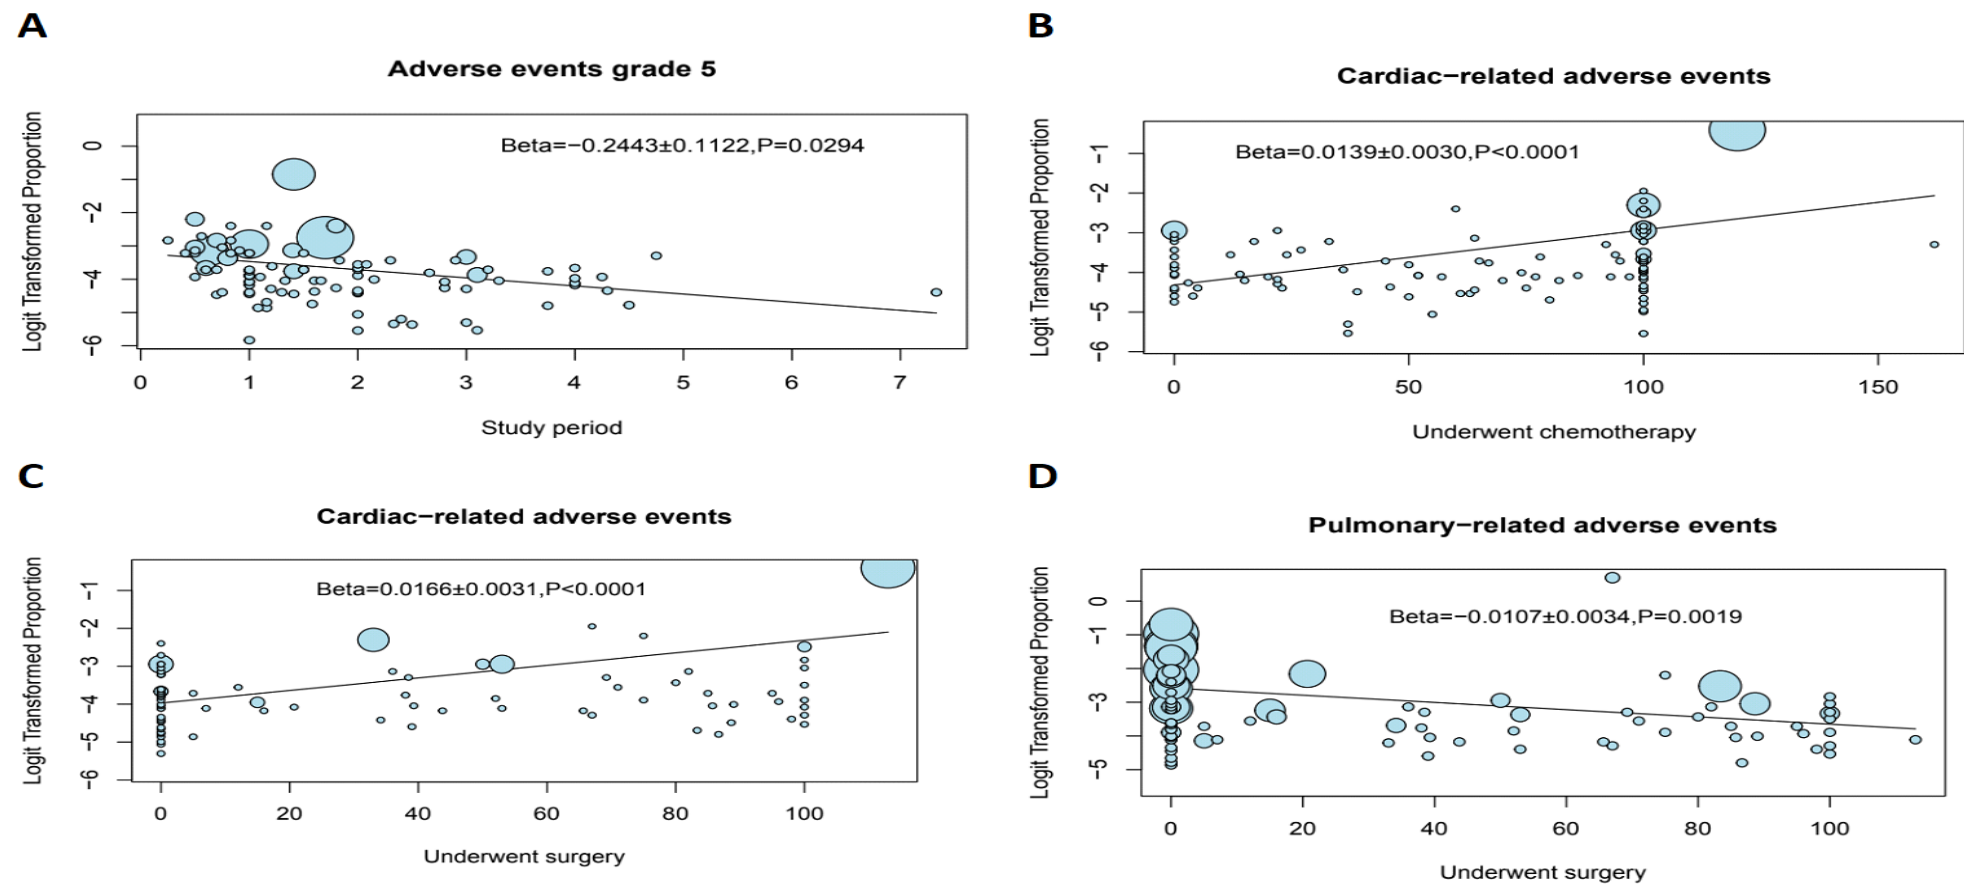

AEs: Adverse events

**Supplementary Figure S3:** Funnel plots for assessment of publication bias; A) for pulmonary irAEs, B) for cardiac irAEs, C) for grade 3,4 irAEs, D) for any grade irAEs, and E) for grade 5 irAEs

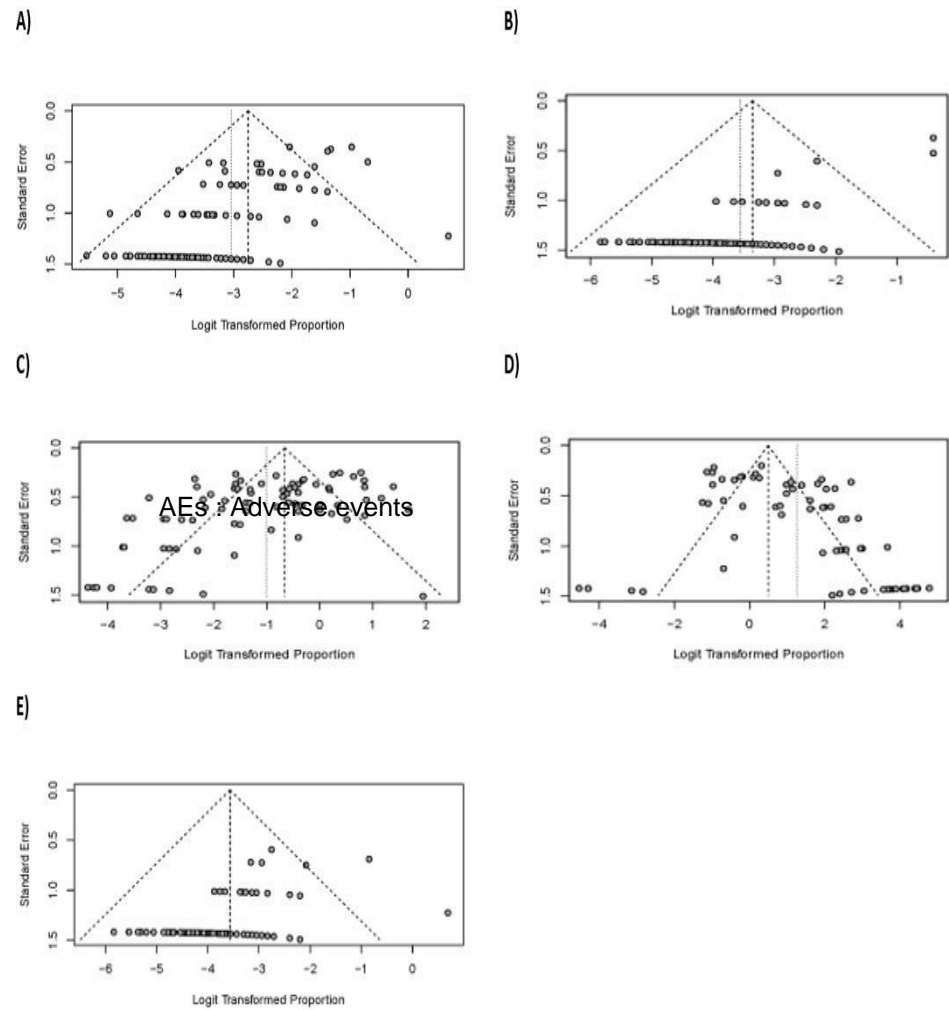

**Supplementary Figure S4:** Threshold analysis showing relation between number of annual cases and grade 3-4 (A), cardiac-related (B), and pulmonary-related (C) adverse events without 33 studies.

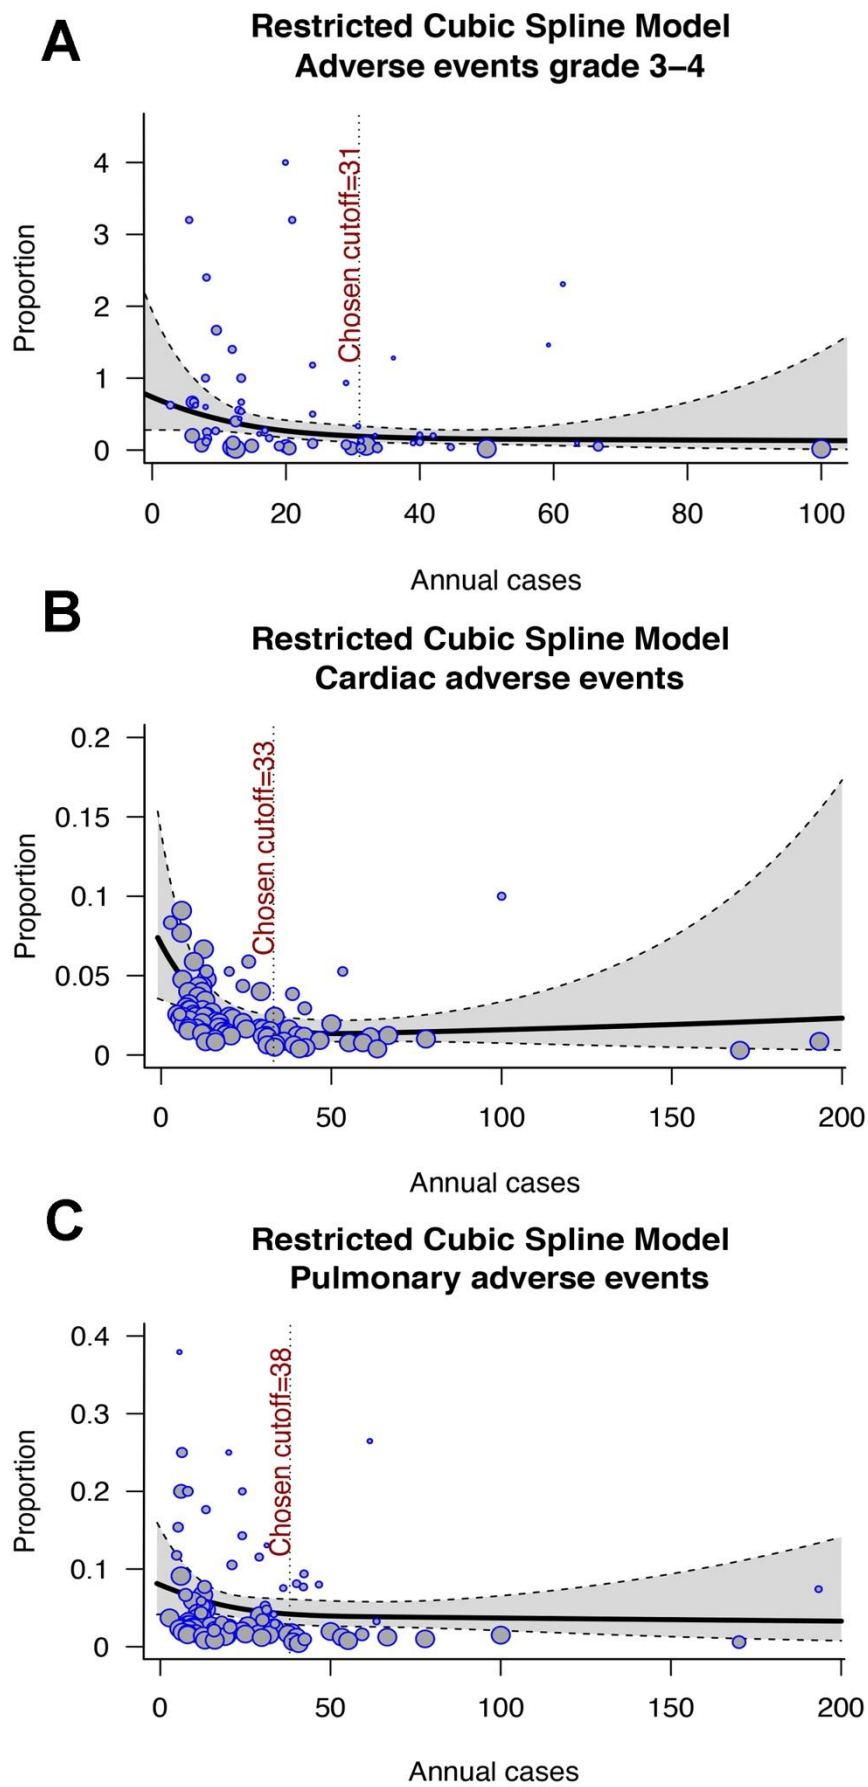

Supplement: s1 [file s1]
